# Trophic ecology of deep-sea megafauna in the ultra-oligotrophic Southeastern Mediterranean Sea

1 Tamar Guy-Haim<sup>1\*</sup>, Nir Stern<sup>1</sup>, Guy Sisma-Ventura<sup>1\*</sup>

2 <sup>1</sup> Israel Oceanographic and Limnological Research, National Institute of Oceanography, Haifa,  
3 3108000, Israel

4 \* Correspondence:

5 Tamar Guy-Haim

6 [tamar.guy-haim@ocean.org.il](mailto:tamar.guy-haim@ocean.org.il)

7 Guy Sisma-Ventura

8 [guy.siv@ocean.org.il](mailto:guy.siv@ocean.org.il)

9

10 **Keywords:** bathyal, stable isotope analysis, trophic level, vertical vs. lateral transport, Bayesian  
11 mixing models, benthic carbon regeneration, carbon limitation, continental slope and rise.

12

## 13 ABSTRACT

14 The trophic ecology of fourteen species of bathybenthic and bathypelagic fishes and six species of  
15 bathybenthic decapod crustaceans from the continental slope and rise of the Southeastern  
16 Mediterranean Sea (SEMS) was examined using stable isotope analysis. Mean  $\delta^{13}\text{C}$  values among  
17 fish species varied by more than 4.0‰, from -20.85‰ (*Macroramphosus scolopax*) to -16.57‰  
18 (*Conger conger* and *Centrophorus granulosus*), and increased as a function of depth (200 - 1400 m).  
19 Mean  $\delta^{13}\text{C}$  values of the crustaceans showed smaller variation, between -16.38‰ (*Polycheles*  
20 *typhlops*) and -18.50‰ (*Aristeus antennatus*). This suggests a shift from pelagic to regenerated  
21 benthic carbon sources with depth. Benthic carbon regeneration is further supported by the low  
22 benthic-pelagic POM- $\delta^{13}\text{C}$  values, averaging  $-24.7 \pm 1.2\text{‰}$ , and the mixing model results, presenting  
23 very low contribution of epipelagic POM to the bathyal fauna. Mean  $\delta^{15}\text{N}$  values of fish and  
24 crustacean species ranged  $7.91 \pm 0.36\text{‰}$  to  $11.36 \pm 0.39\text{‰}$  and  $6.15 \pm 0.31\text{‰}$  to  $7.69 \pm 0.37\text{‰}$ ,  
25 respectively, resulting in trophic position estimates, occupying the third and the fourth trophic levels.  
26 Thus, despite the proximity to the more productive areas of the shallow shelf, low number of trophic  
27 levels (TL~1.0) and narrow isotopic niche breadths (SEAc <1) were observed for bathybenthic  
28 crustaceans (TL =  $3.62 \pm 0.22$ ) and bathypelagic fishes (TL =  $4.33 \pm 0.34$ ) in the study area –  
29 probably due to the ultra-oligotrophic state of the SEMS resulting in limited carbon sources. Our  
30 results, which provide the first trophic description of deep-sea megafauna in the SEMS, offer insight  
31 into the carbon sources and food web structure of deep-sea ecosystems in oligotrophic marginal seas,  
32 and can be further used in ecological modeling and support the sustainable management of marine  
33 resources in the deep Levantine Sea.

## 34 1 Introduction

35 Deep-sea ecosystems cover much of the oceans seafloor and play a major role in large-scale  
36 biogeochemical cycles (Walsh, 1991; Drazen and Sutton, 2017). They provide ecosystem services  
37 that are important to humans, including carbon sequestration, nutrient recycling and burial, waste  
38 accumulation and fisheries production (Danovaro et al., 2008; Mengerink et al., 2014; Thurber et al.,  
39 2014). Recent studies have shown that an increasing number of stressors, including climate change  
40 (warming), deoxygenation, ocean acidification, as well as, overfishing, and natural resource extraction  
41 (e.g., Stramma et al., 2008; Yasuhara et al., 2008; Stramma et al., 2010; Helm et al., 2011; Tecchio et  
42 al., 2015) are expanding into deep environments, thus threatening the diversity and stability of deep-sea  
43 ecosystems. Consequently, studying the status of deep-sea communities and describing deep-sea  
44 ecosystem structures are currently gaining more and more attention.

45 Continental slopes account for ~11% of the total ocean floor (Ramirez-Llodra et al., 2010),  
46 connecting the shallow shelf productive areas with the abyssal plains along steep seabed gradients.  
47 Covering large bathymetric ranges (~ 200 – 2000 m), these dynamic habitats exhibit strong spatial  
48 differences in temperature, salinity, nutrient concentrations and consequently, in habitat suitability  
49 (Koslow, 1993; Gordon et al., 1995; Neat et al., 2008; Bergstad, 2013; Pajuelo et al., 2016). Although  
50 bathyal habitats are relatively isolated from terrestrial inputs, they can support diverse deep-sea fauna  
51 (Gordon and Swan, 1997; Kelly et al., 1998; Menezes et al., 2006; Neat et al., 2008), even in ultra-  
52 oligotrophic basins, such as the easternmost Mediterranean Sea (Goren et al., 2008). In deep-sea  
53 benthic ecosystems, fish can play key ecological and biogeochemical roles (Drazen and Sutton, 2017)  
54 by regulating nutrient limitation and zooplankton populations (Hopkins and Gartner, 1992; Pakhomov  
55 et al., 1996).

56 Deep-benthic ecosystems largely rely on particulate organic matter (POM) that passively sinks from  
57 the surface waters or by lateral transport as a primary source of nutrients (Tecchio et al., 2013).  
58 Animals that carry out vertical diel migrations through the water column (Trueman et al., 2014) and  
59 occasional sink of large animal carcasses is another important food source to deep ecosystems (Smith  
60 and Baco, 2003). Each of these primary food sources carry a distinct isotopic signature that may  
61 reflect its origin, resulting from different chemo-physical processes. Thus, by knowing the isotopic  
62 composition of the food source that fuels a specific food web, it is possible to reconstruct the trophic  
63 structure and dynamics of specific habitats (Post, 2002).

64 Stable isotope analysis (SIA) has been used successfully to study trophic level, important prey types,  
65 and trophic niche breadth in deep-sea ecosystems (e.g., Boyle et al., 2012; Shipley et al., 2017a).  
66 Nitrogen stable-isotope composition ( $\delta^{15}\text{N}$ ) is used to determine the trophic position of an animal, as  
67 it preferentially fractionates as a function of its diet, where the heavy isotopes are retained in the  
68 consumers in respect to their prey by 2–4‰ (Post, 2002). Carbon isotopes ( $\delta^{13}\text{C}$ ) fractionate much  
69 less with each trophic step (<1‰), but can be effectively used to infer basal sources of carbon.  
70 Moreover, SIA provides an integrated view of an organism's diet over time-scales relevant to tissue  
71 turnover rates rather than digestion rates (Peterson and Fry, 1987; Post, 2002), thereby providing  
72 estimates of the trophic position of an organism within a specific food web.

73 Knowledge of food web structure and dynamics is key to our understanding of ecological  
74 communities and their functioning (Polis and Strong, 1996; Winemiller and Polis, 1996). This  
75 fundamental information is, however, lacking in many oceanographic regions, including the  
76 Southeastern Mediterranean Sea (hereafter, SEMS) (Parzanini et al., 2019) – one of the most  
77 oligotrophic, nutrient-impoverished marginal basin, worldwide (Kress et al., 2014). The SEMS

78 provides a miniature model of processes occurring in vast oligotrophic gyres, an ideal location to  
79 study food web structure and functioning under severe nutrient limitation. Furthermore, the SEMS is  
80 one of the regions where sea surface temperatures are rising at the fastest rates under recent climate  
81 changes (Sisma-Ventura et al., 2014; Ozer et al., 2017) and is one of most vulnerable marine regions  
82 to species invasions (Rilov and Galil, 2009), which have been also reported from deep-sea habitats  
83 (Galil et al., 2019). Understanding deep-sea community structure and functioning is of prime  
84 importance for developing better predictions regarding the ecological effects of future climate  
85 change.

86 To date, much of the research describing the trophic ecology of the Eastern Mediterranean Sea  
87 (EMS) has focused on zooplankton groups (Koppelman et al., 2003; Koppelman et al.,  
88 2009; Hannides et al., 2015; Protopapa et al., 2019), shallow rocky reefs (Fanelli et al., 2015), and on  
89 anthropogenically-influenced coastal environments (Grossowicz et al., 2019), while less attention has  
90 been paid to deep-sea fishes and crustaceans that occupy higher trophic levels. Here we used bulk  
91 carbon and nitrogen stable isotopes ( $\delta^{13}\text{C}$  and  $\delta^{15}\text{N}$ ) to study the trophic ecology of bathypelagic and  
92 bathybenthic fishes and crustaceans from the southeast Mediterranean continental slope and rise. We  
93 explored potential factors that may explain the variability in isotope values across species. These data  
94 offer insights into the carbon sources and trophic complexity of deep-sea ecosystems in oligotrophic  
95 marginal seas.

## 96 **2 Materials and methods**

### 97 **2.1 Study sites and sampling design**

98 Sampling campaigns were conducted in the course of three oceanographic cruises during 2017-2019,  
99 as part of the national deep-water monitoring program of the Israeli Mediterranean Sea performed by  
100 Israel Oceanographic and Limnological Research (IOLR). Sampling sites were divided to three major  
101 benthic habitats: (1) the end of the continental shelf, with an average depth of 200 m; (2) the  
102 continental slope with depth range of 500-600 m; and (3) the deep bathyal plateau (continental rise)  
103 with depth range of 1000-1400 m (**Figure 1**). Specimens were collected onboard the R/V *Bat-Galim*,  
104 using a semi-balloon trawl net with an opening of eight meters and mesh size of 10 mm. Once the  
105 trawls were retrieved, animals were sorted, enumerated, weighted and visually identified to species  
106 level. The total length (cm) of each specimen was recorded. Specimens for SIA were selected and  
107 frozen whole at  $-20\text{ }^{\circ}\text{C}$  until processed at the IOLR.

108 POM was collected during three research expeditions in winter 2018, summer 2020, and winter 2021,  
109 across the shelf, slope and rise of the SEMS (**Figure 1**). POM samples were collected throughout the  
110 water column using 8-L Niskin bottles. Water samples were then filtered on pre-combusted 47-mm  
111 glass fiber filters (Whatman) in duplicates at low pressure and dried at  $60\text{ }^{\circ}\text{C}$  for 24 h prior to isotope  
112 analysis.

### 113 **2.2 Stable Isotopes analysis**

114 SIA was conducted on 86 fish and 46 crustacean specimens as well as 77 POM samples (**Table 1**).  
115 White muscle tissue for SIA was dissected from the dorsal musculature of fishes and from the  
116 abdominal segment of the crustaceans. Samples were rinsed with deionized water, frozen, and  
117 lyophilized for 48 h. Freeze-dried samples were homogenized using a mortar and pestle, weighed,  
118 and shipped to the Stable Isotope Facility at Cornell University for SIA analysis. The isotopic  
119 composition of organic carbon and nitrogen was determined by the analysis of  $\text{CO}_2$  and  $\text{N}_2$

120 continuous-flow produced by combustion on a Carlo Erba NC2500 connected on-line to a DeltaV  
121 isotope ratio mass spectrometer coupled with a ConFlo III interface.

122 Measured isotope ratios are reported in the  $\delta$ -notation, i.e., as the deviation in per mill (‰) from the  
123 international standards:

124

$$\delta_{\text{Sample}} = \left( \frac{R_{\text{Sample}}}{R_{\text{standard}}} - 1 \right) \times 10^3$$

125 where, R represents the  $^{15}\text{N}/^{14}\text{N}$  or  $^{13}\text{C}/^{12}\text{C}$  ratio. Stable isotope data are expressed relative to  
126 international standards of Vienna PeeDee belemnite and atmospheric  $\text{N}_2$  for carbon and nitrogen,  
127 respectively. The analytical precision for the in-house standard was  $\pm 0.04\text{‰}$  [ $1\sigma$ ] for both  $\delta^{13}\text{C}$  and  
128  $\delta^{15}\text{N}$ . The C/N ratios of fishes and crustaceans in this study were low (species mean C/N ranged  
129 between 2.33–4.48; where in 97% of individuals  $\text{C/N} < 4.0$ , see **Supplementary Figures 1, 2**),  
130 suggesting that lipids did not significantly affect the  $\delta^{13}\text{C}$  interpretation (Post et al., 2007). Therefore,  
131 all data analyses were performed on uncorrected  $\delta^{13}\text{C}$  values. To determine if the isotopic signatures  
132 of POM samples changed with depth, we used collection depth to classify POM samples as  
133 epipelagic (0–200 m), mesopelagic (200–800 m), or bathypelagic (>800 m).

### 134 **2.3 Data analysis**

135 The trophic position (Trophic Level,  $\text{TrL}_i$ ) was calculated for each species according to Post et al.  
136 (2007):

137

$$\text{TrL}_i = [(\delta^{15}\text{N}_i - \delta^{15}\text{N}_{\text{base}}) / \Delta^{15}\text{N}] + \lambda$$

138 where,  $\delta^{15}\text{N}_i$  is the mean species  $\delta^{15}\text{N}$ , and  $\delta^{15}\text{N}_{\text{base}}$  stands for the primary producer or primary  
139 consumer being used to set the isotopic baseline. We applied the trophic discrimination factor  $\Delta^{15}\text{N}$   
140 of 3.15‰, which was previously used to calculate the trophic level of meso- and bathypelagic fish  
141 (Valls et al., 2014; Richards et al., 2018). The  $\lambda$  represents the trophic level of the organism being  
142 used to set the baseline. Following Protopapa et al. (2019), epipelagic POM was set as the baseline  
143 and  $\lambda$  was set to an intermediate value of 1.5, since it consists mostly of phytoplankton ( $\text{TL} = 1$ ) and  
144 micro- and mesozooplankton ( $\text{TL} = 2$ ) (Albo-Puigserver et al., 2016), equally contributing due to  
145 intensive top-down control in this region (Belkin et al., 2022).

146 Least-squares linear regression analysis was conducted for each species to explore the relationship  
147 between fish length and the  $\delta^{13}\text{C}$  and  $\delta^{15}\text{N}$  values. Spatial variation in  $\delta^{13}\text{C}$  and  $\delta^{15}\text{N}$  of both fishes  
148 and crustaceans was investigated using least-squares linear regression between isotopic values and  
149 bathymetric depths. All statistical analyses were performed in R v. 4.0.5 (R Core Team, 2020).

150 The trophic breadth of each species ( $n > 3$ ) and trophic similarity among species were assessed by  
151 calculating Standard Ellipse Area (SEA) using the R package SIBER v. 2.1.6 (Jackson et al.,  
152 2011; Jackson and Parnell, 2021). Size-corrected SEAs (SEAc) were calculated for each species,  
153 which adjusts for underestimation of ellipse area at small sample sizes and allows for inter-study  
154 comparison of ellipse sizes (Jackson et al., 2011). Fish and crustacean community metrics were  
155 calculated based on Layman et al. (2007).

156 Bayesian mixing models were applied using R package MixSIAR v. 3.1.12 (Stock et al., 2018; Stock  
157 et al., 2021) to estimate the relative contribution of epi-, meso-, and bathypelagic POM to each  
158 species. These models are sensitive to variable discrimination factors (Bond and Diamond, 2011; Olin

159 et al., 2013), which may be influenced by diet (Caut et al., 2009), tissue type (Malpica-Cruz et al.,  
160 2012), temperature (Britton and Busst, 2018), and species-specific metabolic rates (Pecquerie et al.,  
161 2010). Largely, greater  $\delta^{15}\text{N}$  discrimination factors ( $>3.0\text{‰}$ ) are associated with lower trophic-level  
162 species, and are significantly lower ( $<3.0\text{‰}$ ) in higher trophic level species, due to the greater dietary  
163 protein quality of higher trophic level predators (Robbins et al., 2005). Since discrimination factors  
164 for bathyal megafauna are yet to be determined, we used discrimination factors of  $3.15 \pm 1.28\text{‰}$  for  
165  $\delta^{15}\text{N}$  and  $0.97 \pm 1.08\text{‰}$  for  $\delta^{13}\text{C}$  (Sweeting et al., 2007), which have been previously used to study  
166 the trophic structure of meso- and bathypelagic fishes in the Gulf of Mexico (Richards et al., 2018)  
167 and in the Western Mediterranean Sea (Valls et al., 2014). Each model was run with identical  
168 parameters (number of MCMC chains = 3; chain length = 300000; burn in = 200000; thin = 100), and  
169 model convergence was determined using Gelman-Rubin and Geweke diagnostic tests (Stock et al.,  
170 2018).

171

## 172 **3 Results**

### 173 **3.1 Stable isotopes**

174 16.14‰ for crustaceans. Fish mean  $\delta^{13}\text{C}$  values differed by 4.27‰, separating the most depleted  
175 (*Macrorhamphosus scolopax*:  $-20.85 \pm 0.46\text{‰}$ , sampling depth of 200 m) and the most enriched  
176 species (*Centrophorus granulatus* and *Conger conger*:  $-16.89$  and  $-16.57\text{‰}$ , respectively, sampling  
177 depth of ~1000m) (**Table 1, Figure 2**). Crustaceans species-specific mean  $\delta^{13}\text{C}$  varied less by  
178 2.07‰, where the most depleted species was *Parapenaeus longirostris* ( $-18.45 \pm 0.10\text{‰}$ , sampling  
179 depth of 200 m) and the most enriched species was *Polycheles typhlops* ( $-16.38 \pm 0.21\text{‰}$ , sampling  
180 depth of ~1400 m). Species-specific differences in  $\delta^{13}\text{C}$  and  $\delta^{15}\text{N}$  were significant for both fish  
181 (MANOVA,  $F_{13,144} = 19.73$ ,  $p < 0.001$ ) and crustaceans (MANOVA,  $F_{5,78} = 14.62$ ,  $p < 0.001$ ).

182 Species-specific mean  $\delta^{15}\text{N}$  values varied from  $11.36 \pm 0.39\text{‰}$  (*Nezumia* sp. 1100 m depth) to  $7.91 \pm$   
183  $0.36\text{‰}$  (*M. scolopax*, 200 m depth) in fish and from  $6.15 \pm 0.31\text{‰}$  (*Plesionika edwardsii*; 200-600 m  
184 depth) and  $8.07 \pm 0.21\text{‰}$  (*Aristaeomorpha foliacea*; 1400 m depth) in crustaceans. Fish mean  $\delta^{15}\text{N}$   
185 values positively correlated with the  $\delta^{13}\text{C}$  values ( $r^2 = 0.6$ ,  $p < 0.001$ , **Figure 2, Supplementary**  
186 **Figure 1**) and varied among species (ANOVA,  $F_{13,72} = 24.22$ ,  $p < 0.001$ ). Crustaceans, however, did  
187 not show this correlation between  $\delta^{15}\text{N}$  and  $\delta^{13}\text{C}$  ( $r^2 = 0.002$ ,  $p > 0.05$ , **Figure 2, Supplementary**  
188 **Figure 2**), observed in fish from similar depths. Due to limited spatial coverage within each species,  
189 spatial variation could not be tested within each species, and therefore, spatial trends were tested by  
190 addressing all fish species together. Fish  $\delta^{13}\text{C}$  values positively varied with bottom depth ( $r^2 = 0.42$ ;  
191  $P < 0.01$ , **Figure 3**), where the most enriched samples are found at the continental rise ( $> 1000$  m) and  
192 the most depleted at the shallow slope (200m) at the edge of the shelf. This pattern was less clear in  
193 the case of fish  $\delta^{15}\text{N}$  values (**Figure 4**), where species-specific mean values seem more variable in  
194 the continental rise ( $> 1000$  m). Crustaceans mean  $\delta^{15}\text{N}$  values positively correlated with depth ( $r^2 =$   
195  $0.76$ ,  $p = 0.053$ , **Figure 4**), while their mean  $\delta^{13}\text{C}$  values showed no such correlation (**Figure 3**).

196 POM collected from depths ranging from 0 to 1135 m, exhibited a wide  $\delta^{13}\text{C}$  range ( $-27.36$  to  $-$   
197  $21.54\text{‰}$ ) and  $\delta^{15}\text{N}$  range ( $-3.25$  to  $12.76\text{‰}$ ), with POM samples generally becoming more enriched  
198 in  $^{15}\text{N}$  and more depleted in  $^{13}\text{C}$  at bottom depths (**Figure 5**). Significant differences in POM  $\delta^{13}\text{C}$   
199 and  $\delta^{15}\text{N}$  among the three vertical depth zones were observed (MANOVA,  $F_{2,148} = 8.65$ ,  $p < 0.001$ ).  
200 POM- $\delta^{13}\text{C}$  and C/N ratio exhibited a negative correlation (**Supplementary Figure 3**), which was not  
201 observed in POM- $\delta^{15}\text{N}$  and C/N ratio.

## 202 3.2 Trophic level estimates

203 We used the average epipelagic POM- $\delta^{15}\text{N}$  value ( $0.52 \pm 1.84\text{‰}$ ) as a baseline for estimating  
204 species-specific TL, following Richards et al. (2018). The  $\delta^{15}\text{N}$  of bathypelagic primary consumers  
205 was not available for similar calculation. However, based on the low  $\delta^{15}\text{N}$  values of zooplankton in  
206 the eastern Mediterranean, it was assumed that the primary food source, namely smaller zooplankton,  
207 phytoplankton and particles has a  $\delta^{15}\text{N}$  value around zero (Koppelman et al., 2009). Large  
208 mesozooplankton (333 mm mesh size, upper water column)  $\delta^{15}\text{N}$  values in the EMS show an  
209 enrichment trend across a west-east transect (SE Crete mean  $\delta^{15}\text{N}$  value  $\sim 2.0\text{‰}$  and SE Cyprus mean  
210  $\delta^{15}\text{N}$  value  $\sim 4.0\text{‰}$ , Koppelman et al. 2009). The average  $\Delta^{15}\text{N}$  of phytoplankton-zooplankton and  
211 zooplankton-fish in the study area yielded enrichment factors of 2.5 and 3.9‰, respectively  
212 (Grossowicz et al. 2019). Using this factor, our measured epipelagic POM- $\delta^{15}\text{N}$  value ( $0.52 \pm$   
213  $1.84\text{‰}$ ) could be also inferred and confirmed using the large mesozooplankton  $\delta^{15}\text{N}$  value of  $\sim 4.0\text{‰}$   
214 reported by Koppelman et al. (2009). When epipelagic POM data were used to set the baseline, fish  
215 TL ranged from  $3.85 \pm 0.11$  (*M. scolopax*; 200 m depth) to 4.91 (*C. conger*; 1000 m depth), while the  
216 average TL of all fish species was  $4.33 \pm 0.34$  (**Figure 6**). Crustaceans-  $\delta^{15}\text{N}$  values yielded TLs  
217 between 3.29 and 3.78, with an average of  $3.62 \pm 0.22$  (**Figure 6**).

218 Of the species examined, only few enabled an estimation of ontogenetic effect (**Figure 7**). This is due  
219 to the low range of body size within individual species that were sampled in this study. Nevertheless,  
220 the crustaceans *A. eximia* ( $r^2 = 0.82$ ;  $p < 0.001$ ) and *P. edwardsii* ( $r^2 = 0.72$ ;  $p < 0.05$ ) exhibited a  
221 positive relationship between length and  $\delta^{15}\text{N}$  values. Size and  $\delta^{13}\text{C}$  values did not yield significant  
222 correlations. Positive relationship between size and  $\delta^{15}\text{N}$  values was also observed for the fish *Dentex*  
223 *macrophthalmus* ( $r^2 = 0.59$ ;  $p < 0.05$ ).

## 224 3.3 Trophic niche breadth

225 Isotopic niche breadth, calculated using SEAc (**Table 2, Figure 8**), was largest for the fish collected  
226 from the shallow continental slope *Coelorinchus caelorhincus* (SEAc = 2.04), *D. macrophthalmus*  
227 (SEAc = 0.94) and *M. scolopax* (SEAc = 0.66), and for the shrimps *A. foliacea* (SEAc = 0.96) and  
228 *Aristeus antennatus* (SEAc = 0.63), both opportunistic carnivores. The smallest isotopic niche  
229 breadth belonged to *Bathypterois mediterraneus* (SEAc = 0.009), a planktivorous fish. Fish and  
230 crustacean community metrics (**Table 3**) showed higher convex hull area (TA) in fish (TA = 7.37)  
231 than in crustaceans (TA = 0.81), indicating a larger trophic community width (Layman et al. 2007).

## 232 3.4 Bayesian mixing models

233 The results of the mixing models indicate that most deep-sea fish and crustacean consumers included  
234 in this study derive the bulk of their carbon from bathypelagic POM (**Figure 9**). Relative  
235 contributions of epi- and mesopelagic POM ranged from  $0.3 \pm 0.3\%$  in *Nezumia* sp. to  $17.1 \pm 8.1\%$  in  
236 *Lepidotrigla cavillone*, while contributions from bathypelagic POM were much higher, ranging from  
237  $73.7 \pm 4.3\%$  in *L. cavillone* to  $99.3 \pm 0.5\%$  in *Nezumia* sp., with the exception of *M. scolopax* that  
238 had similar bathypelagic and mesopelagic contribution ( $45.7 \pm 5.0\%$  and  $40.4 \pm 12.4\%$ , respectively).  
239 Diagnostic plots of posterior distributions (**Supplementary Figure 4**) revealed high negative  
240 correlations between bathypelagic POM and epi/mesopelagic POM ( $R_{\text{epi-bathy}} = -0.78$ ,  $R_{\text{meso-bathy}} = -$   
241  $0.49$ ) and a low negative correlation between epi- and mesopelagic POM ( $R_{\text{epi-meso}} = -0.17$ ). The  
242 negative correlation is likely caused by the similar  $\delta^{13}\text{C}$  signatures of sources and not from a missing  
243 carbon source, since producer data fully constrain consumer data when an appropriate trophic  
244 enrichment factor is applied (Richards et al., 2018) and that model diagnostics indicate that the model

245 fully converged (Gelman-Rubin Diagnostic: all variables  $<1.01$ ; Gweke Diagnostic:  $<5\%$  of variables  
246 outside  $\pm 1.96$  for each chain).

#### 247 **4 Discussion**

248 This is the first attempt to elucidate the trophic ecology of deep-sea fish and crustacean species in the  
249 SEMS. The knowledge gained in this study provides insights into the main energy sources sustaining  
250 deep-sea food webs in one of the most oligotrophic, nutrient-improvised marine basins, worldwide.  
251 However, insights gained in this study are not limited to the SEMS alone, and can be ascribed to  
252 many oligotrophic basins with limited carbon and nutrient sources.

253 Our  $\delta^{13}\text{C}$  and  $\delta^{15}\text{N}$  values varied across fish species and as a function of bathymetric depth,  
254 suggesting that depth and diet are controlling the trophic positions inferred from our stable isotope  
255 data. As expected, top predators such as the European conger eel *C. conger*, occupied the highest  
256 trophic position. The rattail *Nezumia* sp., a small macrourid fish that was collected from similar  
257 depths of  $>1000$  m, yielded similar high  $\delta^{15}\text{N}$  values. Both species occupied a maximum trophic level  
258 of 4.89-4.91. Polunin et al. (2001) found similar trophic position of 4.4 for both the shark  
259 *Centroscymnus coelolepsis* and *Nezumia aequalis* in the continental slope of the Balearic Islands.  
260 High  $\delta^{15}\text{N}$  values of *Nezumia* ( $11.09 \pm 0.58\text{‰}$  and  $11.31\text{‰}$ ) were also recorded by Fanelli and Cartes  
261 (2010) in the Archipelago of Cabrera (Algerian Basin) and by Papiol et al. (2013) in the Balearic  
262 Islands (Catalan Sea, West Mediterranean), respectively, and were attributed to the suprabenthic  
263 crustaceans and polychaetes that constitute the diet of this macrourid. Our TL data also agree well  
264 with that of benthic carnivorous fish from Bay of Banyuls-sur-Mer (northwest Mediterranean,  
265 France; Carlier et al., 2007). Among the fish, the lowest trophic level ( $3.85 \pm 0.11$ ) was found in the  
266 snipefish *M. scolopax*, which feeds on hyperbenthic demersal zooplankton during daytime  
267 (Carpentieri et al., 2016). This was also inferred from the results of the mixing models, indicating a  
268 relatively high contribution of mesopelagic POM to the diet of *M. scolopax*. Relatively to the fish,  
269 the bathybenthic crustaceans measured in this study occupied lower trophic positions – between 3.29  
270 and 3.78, in agreement with the TL of deep benthic invertebrates of the Western Mediterranean  
271 (Carlier et al., 2007).

272 In the fish species examined here, mean  $\delta^{15}\text{N}$  values spanned  $3.45\text{‰}$ , about 1.1 TL, while in the  
273 crustacean species mean  $\delta^{15}\text{N}$  values spanned  $1.92\text{‰}$ , about 0.6 TL (assuming trophic enrichment  
274 factor of  $3.15\text{‰}$ ). Our observed ranges of estimated trophic levels are in line with other studies  
275 examining Mediterranean (1.1 TL, Valls et al., 2014), Pacific (1.6 TL, Choy et al., 2015), and the  
276 Gulf of Mexico (0.62 TL, Richards et al., 2018). Different feeding strategies as well as different  
277 migration habits may explain wider range of  $\delta^{15}\text{N}$  (Shipley et al., 2017a; Richards et al., 2020).  
278 Despite of the reliance on similar basal production, mesopelagic fishes from the Western  
279 Mediterranean were segregated by trophic position, between 2.9 for the small bristlemouth  
280 *Cyclothone braueri* to 4.0 for the lanternfish *Lobianchia dofleini* (Valls et al., 2014), and bathyal  
281 fishes off the Balearic Islands appeared to be foraging over two to three full trophic levels (Polunin et  
282 al., 2001). Our results support a much narrower trophic range for bathyal fish and bathybenthic  
283 decapod crustaceans in the SEMS. We attribute this narrow range to the ultra-oligotrophic state of the  
284 SEMS, resulting in limited carbon sources to sustain the deep-sea food webs, reflected by a general  
285 increase of  $\delta^{13}\text{C}$  in fish as function of bottom depth. This pattern could be driven by a number of  
286 factors including shifting production sources, or shifts in community composition and feeding  
287 strategies, and or switching from benthic to pelagic prey (Fanelli et al., 2011; Trueman et al., 2014).  
288 For example,  $^{13}\text{C}$  became more depleted in individuals captured at greater depths in the deep-sea  
289 island slope system of the Exuma Sound, the Bahamas (Shipley et al., 2017b). Inshore-to-offshore

290 depletion in  $^{13}\text{C}$  values were also apparent in epipelagic fishes in the northern California Current,  
291 where copepods, gelatinous zooplankton, and nekton showed a significant linear decrease in  $\delta^{13}\text{C}$   
292 with distance offshore (Miller et al., 2008).

293 The major carbon sources supporting deep-sea food webs are poorly defined, aside from oligotrophic  
294 open-ocean gyres, where sinking phytoplanktonic-POM is considered the main energy source  
295 (Shiple et al., 2017b). This was observed by a narrow range of  $\delta^{13}\text{C}$  in meso- and bathypelagic  
296 predatory fishes in the Gulf of Mexico, indicating similar epipelagic carbon source (Richards et al.,  
297 2018). Conversely, the results of our mixing-models show that the majority of carbon ( $92.19 \pm$   
298  $12.54\%$ ) supporting the species examined in this study is not derived from epipelagic sources. An  
299 alternative hypothesis is that the source of carbon in the deep-sea originates from the shelf. A  
300 significant proportion of neritic-derived primary production may be transported into deep-sea  
301 systems by currents (Suchanek et al., 1985; Sanchez-Vidal et al., 2012; Efrati et al., 2013), or via  
302 lateral transport (Fahl and Nöthig, 2007), and once assimilated into the food web, more enriched  $^{13}\text{C}$   
303 values are to be expected (Polunin et al., 2001; Fanelli et al., 2011). Katz et al. (2020) used deep-sea  
304 sediment traps in the Israeli Southeastern Mediterranean Sea and showed that lateral transport from  
305 the continental margin contributes the greatest fraction of particulate flux to the seafloor. Therefore,  
306 we suggest that lateral transport constitutes the main source of carbon to the deep-sea food web in the  
307 Southeastern Mediterranean Sea.

308 Since the carbon signature of primary producers can significantly vary between macroalgae and  
309 different phytoplankton groups (Fanelli et al., 2011; Grossowicz et al., 2019), food webs that show a  
310 linear relationship between  $\delta^{15}\text{N}$  and  $\delta^{13}\text{C}$  values are suggestive of a single food source (Polunin et  
311 al., 2001; Carlier et al., 2007). Generally weak  $\delta^{13}\text{C}$ - $\delta^{15}\text{N}$  correlations were found in deep-sea  
312 macrozooplankton and micronekton off the Catalan slope likely due to the consumption of different  
313 kinds of sinking particles (e.g. marine snow, phytodetritus). Multiple recycling of POM constituted  
314 an enrichment effect on the  $\delta^{13}\text{C}$  and  $\delta^{15}\text{N}$  values of deep-sea macrozooplankton and micronekton  
315 (Fanelli et al., 2011). Our results yielded significant positive correlation between fish  $\delta^{15}\text{N}$  and  $\delta^{13}\text{C}$   
316 values, further supporting a single food source.

317 Our results showed that  $\delta^{13}\text{C}$  fractionates less than 1.0‰ for each trophic position. The  $\Delta^{13}\text{C}$  between  
318 the mean water column POM-  $\delta^{13}\text{C}$  ( $-24.13 \pm 1.56\%$ ) and fish/crustaceans  $\delta^{13}\text{C}$  ( $-18.10 \pm 0.93\%$ ) of  
319 the SEMS amounted to 6.04‰ (equal to at least six trophic positions), and therefore, cannot be  
320 attributed to trophic enrichment, but rather to the regeneration of benthic carbon sources. Moreover,  
321 our  $\delta^{13}\text{C}$ -C/N data support the potential effect of microbially degraded phyto-detritus resulting in  
322 higher isotopic values of nitrogen and carbon in deep benthic food webs compared with pelagic food  
323 web (Papiol et al., 2013; Romero-Romero et al., 2021).

324 Deep-sea ecosystems are subjected to exacerbating anthropogenic stressors, including overfishing,  
325 chemical pollution, mining, dumping, litter, plastics, and climate change (Davies et al., 2007). In  
326 oligotrophic environments such as the ultra-oligotrophic SEMS, deep-sea ecosystems are further  
327 vulnerable to reduced food availability (Kröncke et al., 2003). Regeneration of benthic carbon  
328 sources, supported by this study, provides oligotrophic deep-sea food webs with a greater ability to  
329 endure carbon limitation. Nonetheless, benthic carbon source originating in lateral transport from the  
330 shallow shelf to the deep-sea, as indicated here, may carry detrimental implications to the ecosystem  
331 via pollutant accumulation and biomagnification (Liu et al., 2020). This is particularly important in  
332 marginal seas that are prone to anthropogenic pollution (Kim et al., 2019; Shoham-Frider et al.,  
333 2020). Continuous studies should be undertaken to further unveil the implications of lateral transport  
334 and benthic carbon regeneration to deep-sea food webs.



## 335 5 Data Availability Statement

336 The datasets generated for this study can be found in the open-access data repository PANGAEA,  
337 and will be made publicly available with publication.

## 338 6 Figures and Tables

### 339 6.1 Figures

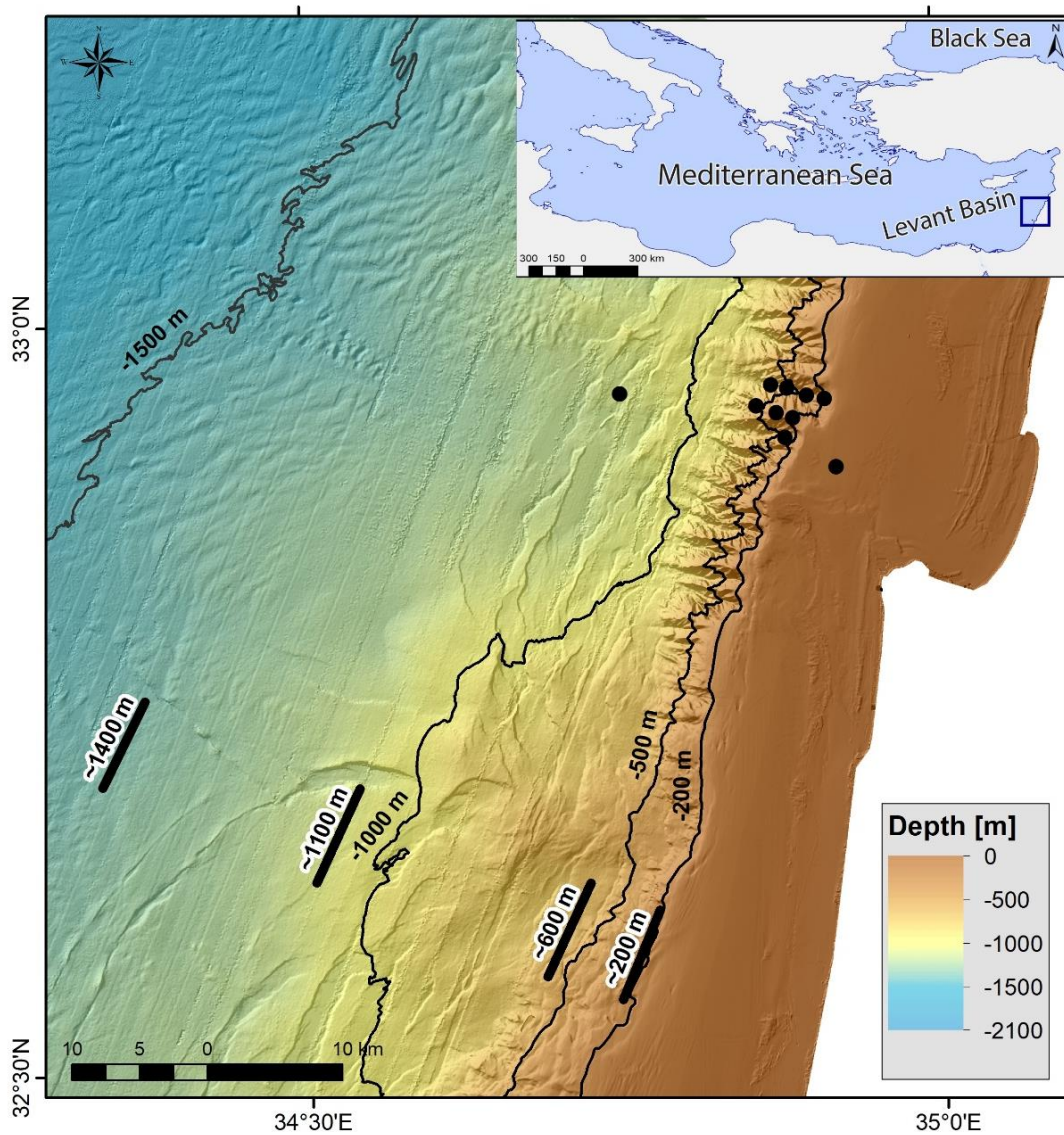

340 **Figure 1.** Map of sampling sites in the SEMS. The locations of POM samples are presented in black  
341 circles, and locations of fishes and crustaceans by trawl net are presented in black lines.  
342

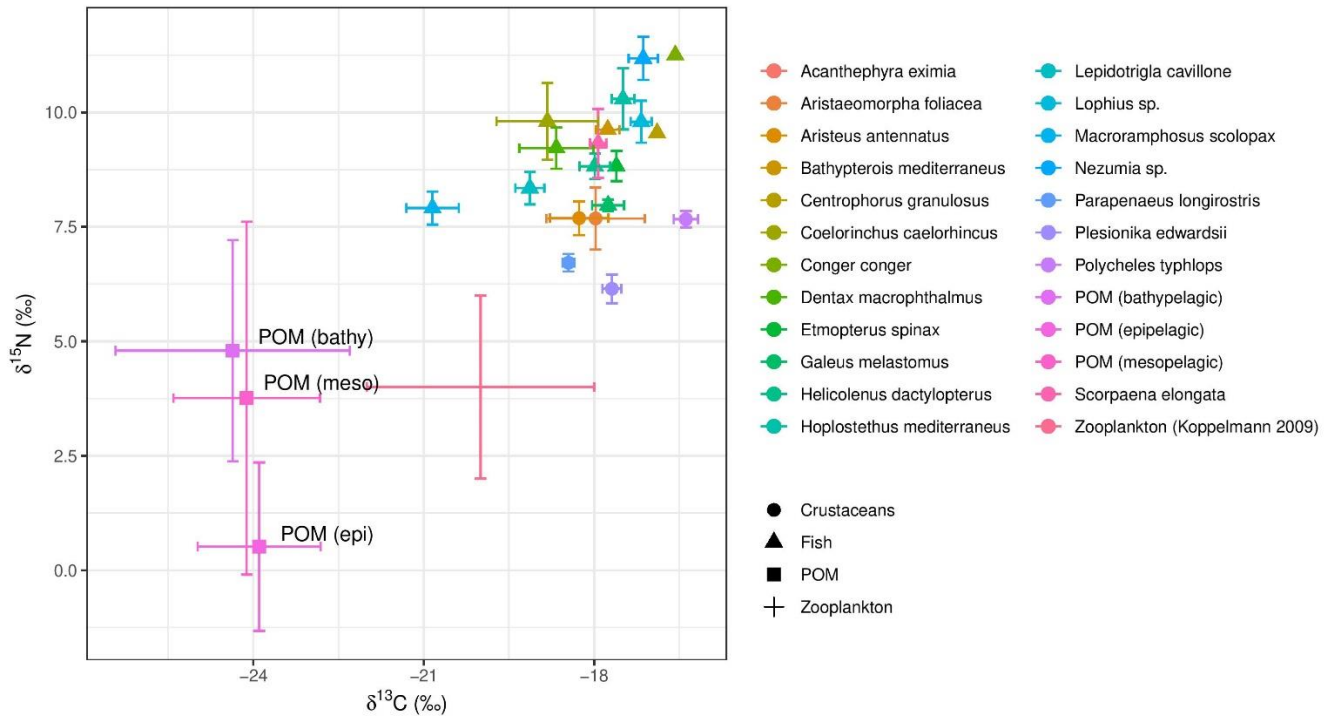

343

344 **Figure 2.** Isotope biplot of  $\delta^{13}\text{C}$  and  $\delta^{15}\text{N}$  values of Levantine deep-sea decapod crustaceans (circles)  
345 and fishes (triangles), zooplankton (cross, based on Koppelman et al. 2009), and POM (squares).  
346 Data points represent means and error bars represent  $\pm\text{SD}$ .

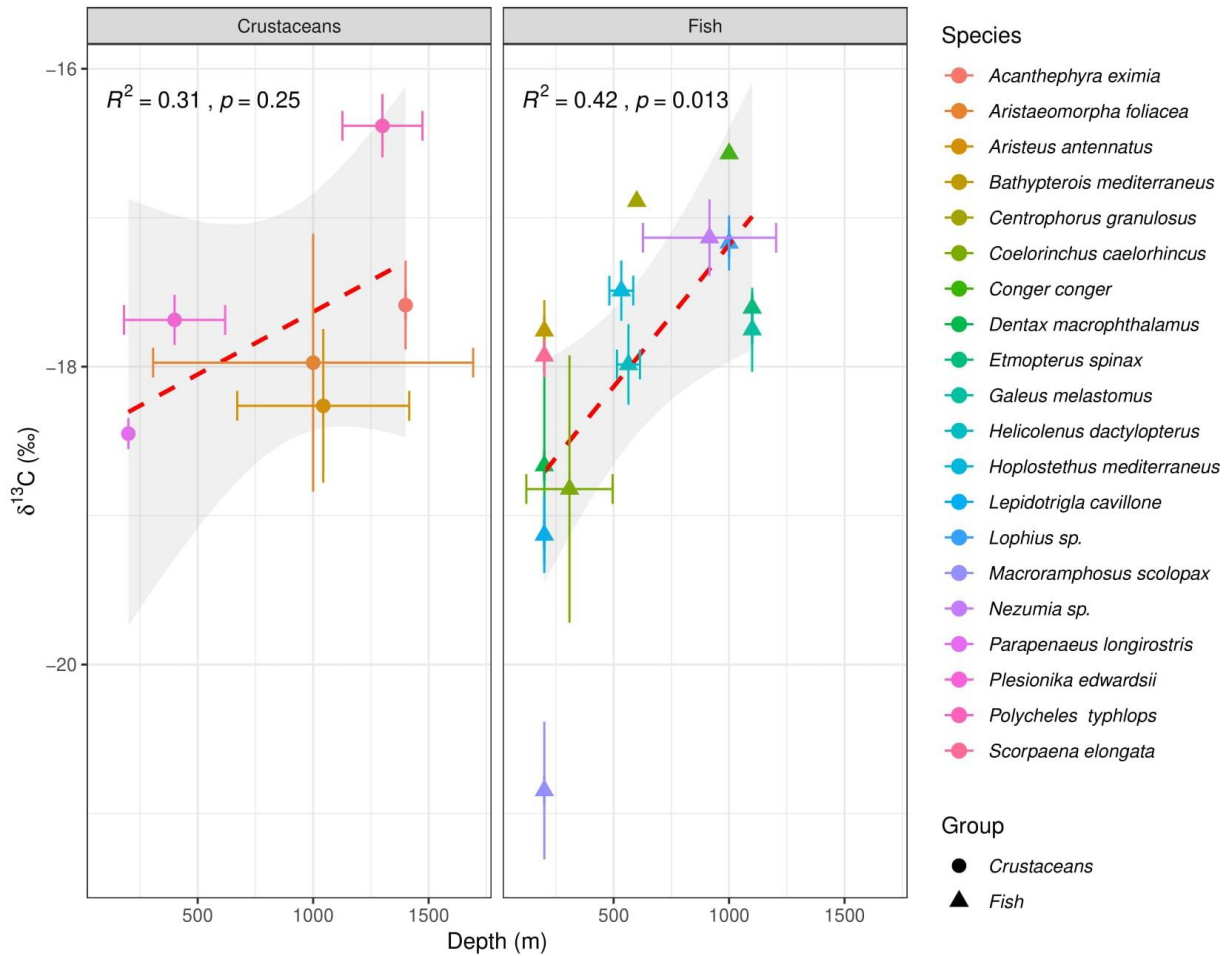

347

348 **Figure 3.** Correlations between mean δ<sup>13</sup>C (‰) and depth (m) in Levantine deep-sea decapod  
349 crustaceans (left) and fish (right). Dash lines represent Least-squares regression line.

350

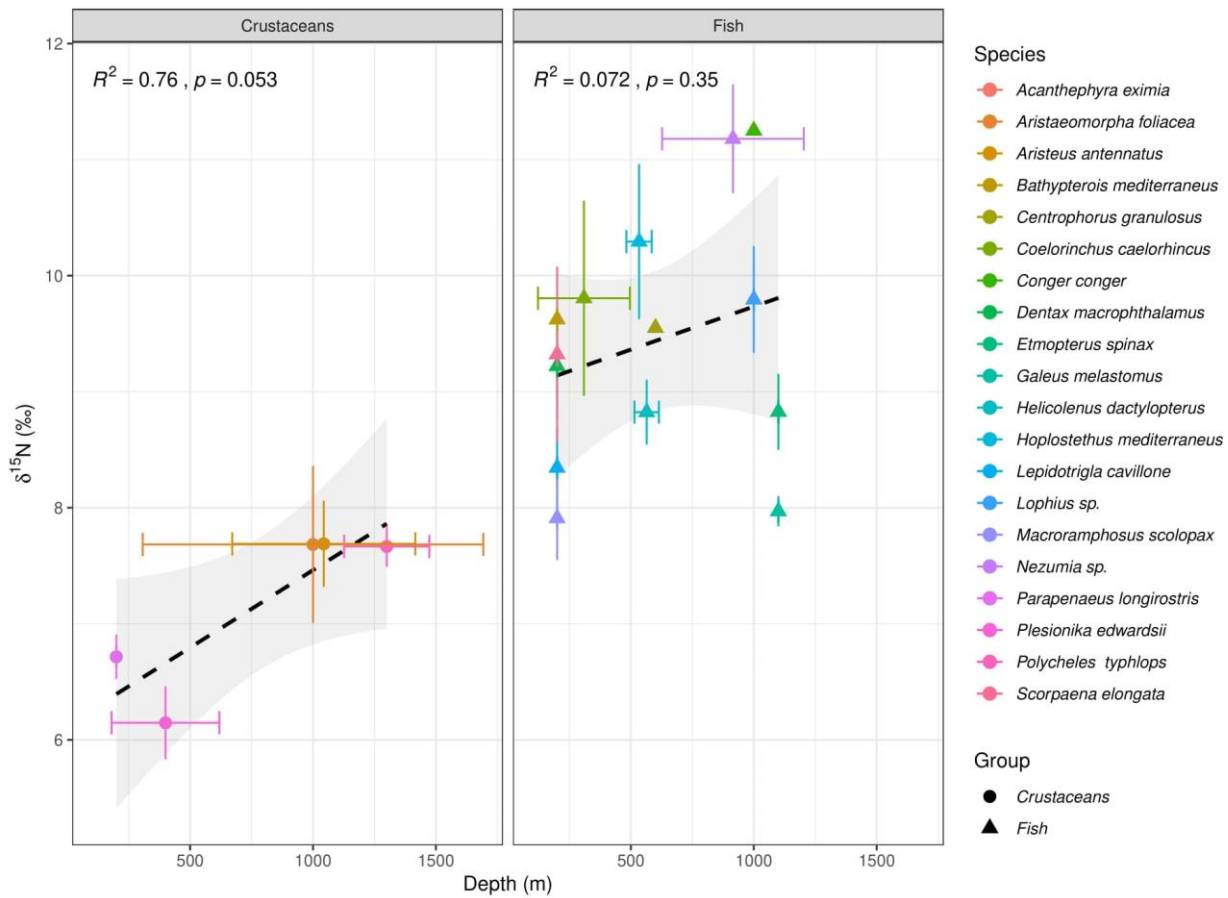

351

352 **Figure 4.** Correlations between mean  $\delta^{15}\text{N}$  (‰) and depth (m) in Levantine deep-sea decapod  
353 crustaceans (left) and fish (right). Dash lines represent Least-squares regression line.

354

355

356

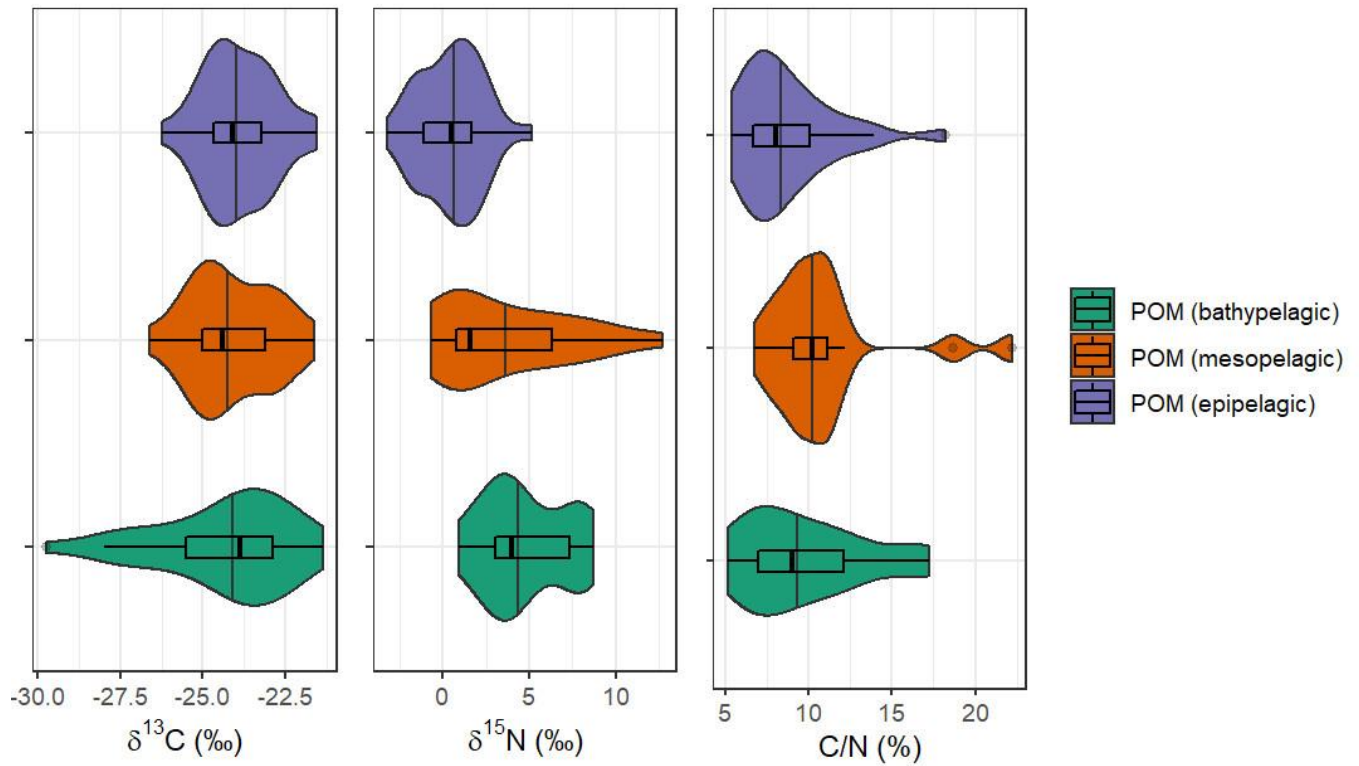

357

358 **Figure 5.** Violin charts with boxplots showing POM- $\delta^{15}\text{N}$  (‰), POM- $\delta^{13}\text{C}$  (‰) and POM-C/N ratio  
359 collected from epipelagic (0-200 m), mesopelagic (201-800 m), and bathypelagic (>800 m) depths in  
360 the Southeastern Mediterranean Sea during 2018-2021.

361

362

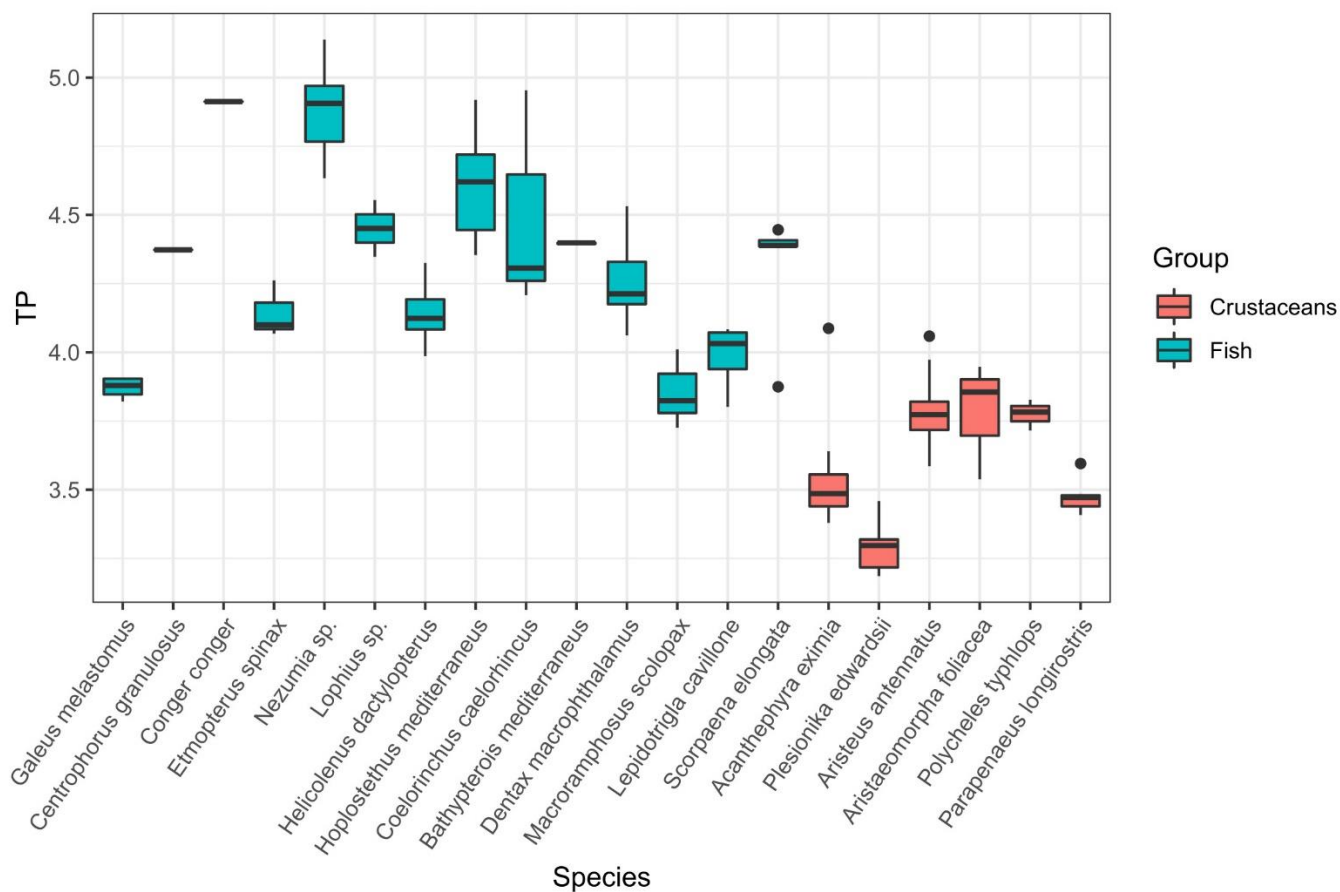

363

364 **Figure 6.** Trophic level (TL) estimates calculated using  $\delta^{15}\text{N}$  data of deep-sea Levantine decapod  
365 crustaceans (red) and fish (blue) species, using epipelagic POM to establish isotopic baseline.

366

367

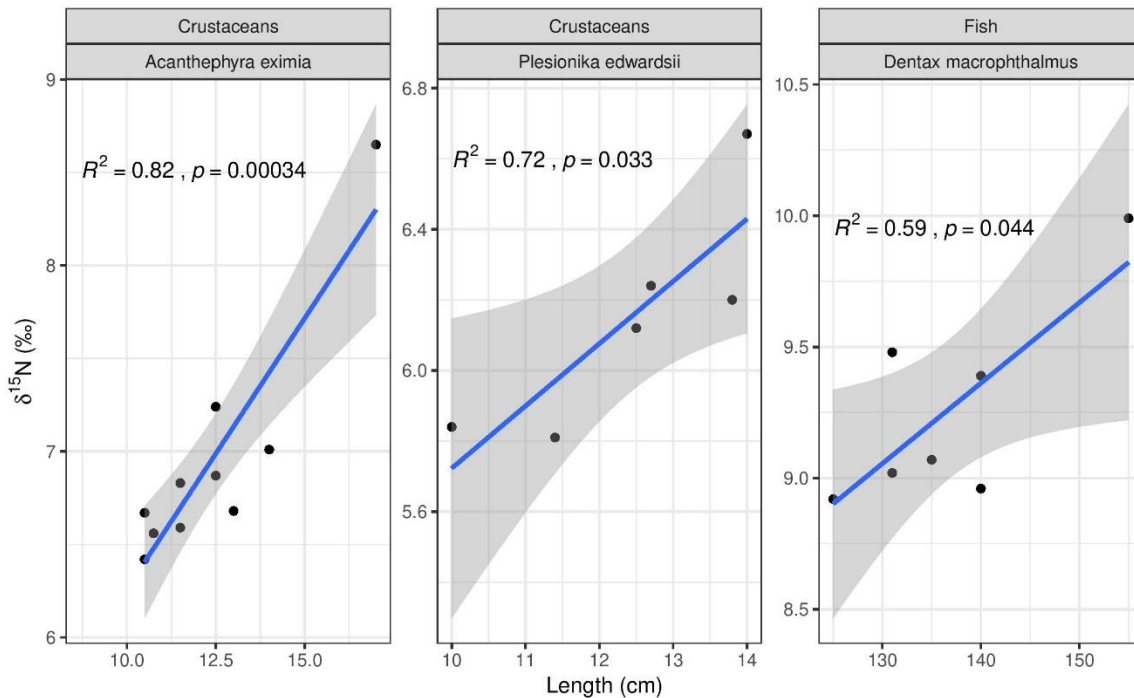

368

369 **Figure 7.** Least-squares regression analysis between total length (cm) and  $\delta^{15}\text{N}$  values in the decapod  
370 crustaceans *A. eximia* ( $n=10$ ) and *P. edwardsii* ( $n=6$ ), and the fish *D. macrophthalmus* ( $n=7$ ).

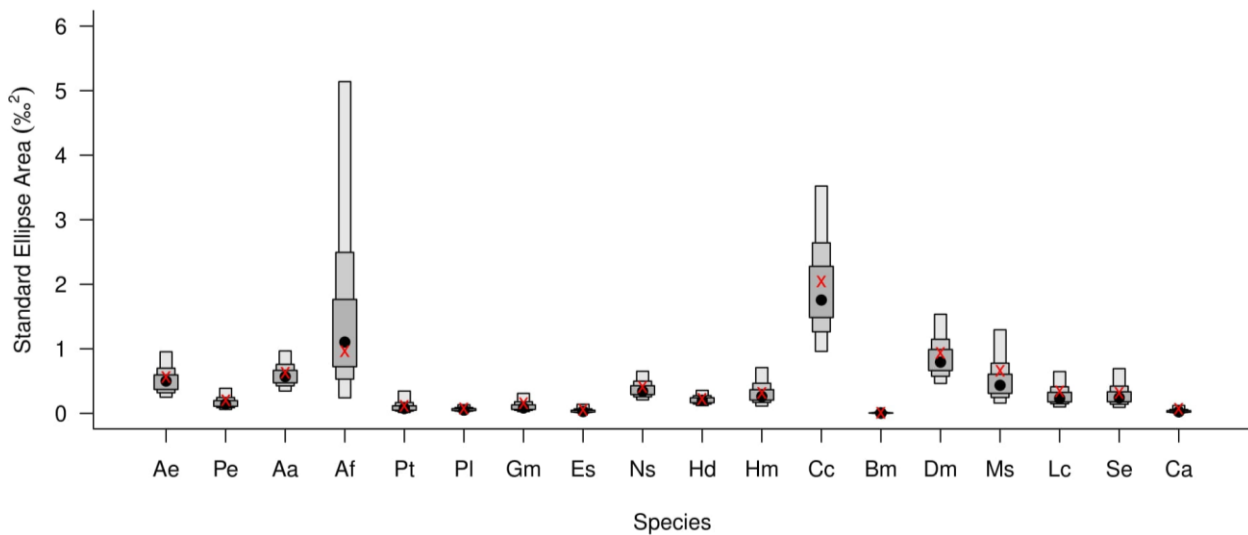

371

372 **Figure 8.** Trophic niche breadth of Levantine deep-sea fish and decapod crustaceans ( $n \geq 3$ ) estimated  
373 by size-corrected standard ellipse area ( $\text{SEA}_B$ ) boxplots (showing 95, 75 and 50 % credibility  
374 intervals). Black circles represent means; red x symbols represent the maximum likelihood estimates  
375 of  $\text{SEA}_B$ . Ae - *Acantheephyra eximia*; Pe - *Plesionika edwardsii*; Aa - *Aristeus antennatus*; Af -  
376 *Aristaeomorpha foliacea*; Pt - *Parapenaeus longirostris*; Pl - *Parapenaeus longirostris*; Gm - *Galeus*  
377 *melastomus*; Es - *Etmopterus spinax*; Ns - *Nezumia* sp.; Hd - *Helicolenus dactylopterus*; Hm -  
378 *Hoplostethus mediterraneus*; Cc - *Coelorinchus caelorhincus*; Bm - *Bathypterois mediterraneus*; Dm  
379 - *Dentax macrophthalmus*; Ms - *Macroramphosus scolopax*; Lc - *Lepidotrigla cavillone*; Se -  
380 *Scorpaena elongata*.

381

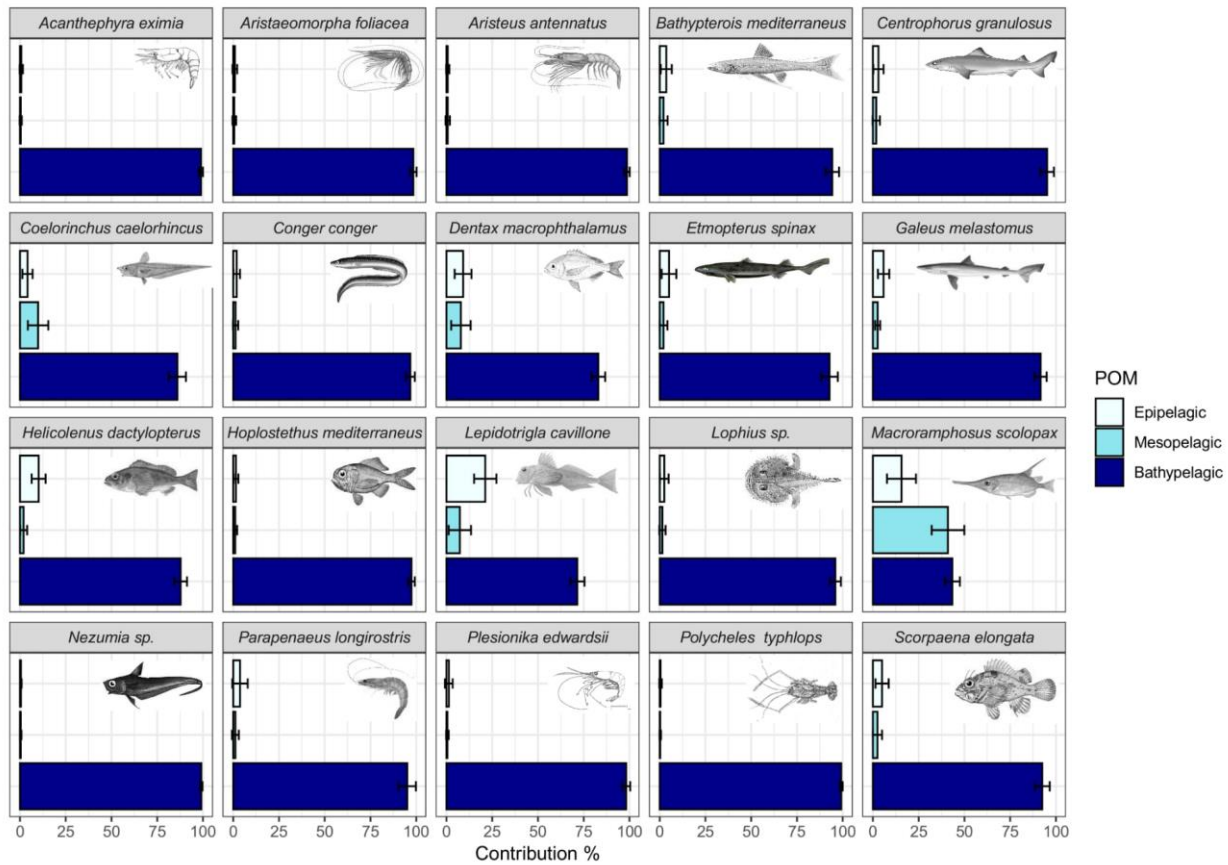

382

383 **Figure 9.** Estimated relative contributions (%) of POM collected from epi-, meso- and bathypelagic  
 384 depths (0-200, 201-800, >800 m, respectively) to Levantine deep-sea fish and decapod crustaceans,  
 385 based on Bayesian mixing models. Bars represent mean contributions and error bars represent  $\pm$ SD.

386

387

388

389

390

391

392

393



394 **6.2 Tables**

395 **Table 1:** Sample descriptions and bulk  $\delta^{13}\text{C}$  and  $\delta^{15}\text{N}$  isotope data (mean  $\pm$  SD).

| Sample type / Species (abbreviation)   | n  | Depth (m) | Total length (cm) | Total weight (g)   | $\delta^{13}\text{C}$ (‰) | $\delta^{15}\text{N}$ (‰) | C/N              |
|----------------------------------------|----|-----------|-------------------|--------------------|---------------------------|---------------------------|------------------|
| <b>Fish</b>                            |    |           |                   |                    |                           |                           |                  |
| <i>Bathypterois mediterraneus</i> (Bm) | 3  | 200       | 9.73 $\pm$ 1.63   | 5.00 $\pm$ 2.08    | -17.76 $\pm$ 0.21         | 9.62 $\pm$ 0.01           | 2.94 $\pm$ 0.02  |
| <i>Centrophorus granulatus</i> (Cg)    | 1  | 600       | n/a               | n/a                | -16.89                    | 9.55                      | 2.39             |
| <i>Coelorinchus caelorhincus</i> (Cc)  | 11 | 200-600   | 15.55 $\pm$ 4.11  | 17.00 $\pm$ 15.65  | -18.82 $\pm$ 0.90         | 9.81 $\pm$ 0.84           | 3.36 $\pm$ 0.37  |
| <i>Conger conger</i> (CCo)             | 1  | 1000      | 87                | 1296               | -16.57                    | 11.25                     | 3.03             |
| <i>Dentex macrophthalmus</i> (Dm)      | 12 | 200       | 13.67 $\pm$ 0.97  | 42.00 $\pm$ 8.96   | -18.67 $\pm$ 0.65         | 9.22 $\pm$ 0.45           | 3.38 $\pm$ 0.26  |
| <i>Etmopterus spinax</i> (Es)          | 3  | 1100      | 30.67 $\pm$ 1.17  | 121.00 $\pm$ 15.31 | -17.61 $\pm$ 0.05         | 8.83 $\pm$ 0.33           | 2.62 $\pm$ 0.20  |
| <i>Galeus melastomus</i> (Em)          | 4  | 1100      | 33.53 $\pm$ 4.99  | 114.00 $\pm$ 39.62 | -17.75 $\pm$ 0.28         | 7.97 $\pm$ 0.13           | 2.42 $\pm$ 0.10  |
| <i>Helicolenus dactylopterus</i> (Hd)  | 14 | 500-600   | 17.50 $\pm$ 1.75  | 95.00 $\pm$ 29.88  | -17.99 $\pm$ 0.27         | 8.82 $\pm$ 0.28           | 3.09 $\pm$ 0.16  |
| <i>Hoplostethus mediterraneus</i> (Hm) | 6  | 500-600   | 16.00 $\pm$ 1.41  | 62.00 $\pm$ 5.66   | -17.49 $\pm$ 0.20         | 10.29 $\pm$ 0.67          | 3.04 $\pm$ 0.16  |
| <i>Lepidotrigla cavillone</i> (Lc)     | 6  | 200       | 10.03 $\pm$ 0.60  | 14.00 $\pm$ 2.22   | -19.13 $\pm$ 0.25         | 8.35 $\pm$ 0.35           | 3.10 $\pm$ 0.25  |
| <i>Lophius budegassa</i> (Lb)          | 2  | 1000      | 65.55 $\pm$ 21.14 | 37.00 $\pm$ 2.12   | -17.17 $\pm$ 0.18         | 9.80 $\pm$ 0.46           | 3.09 $\pm$ 0.01  |
| <i>Macroramphosus scolopax</i> (Ms)    | 5  | 200       | 9.08 $\pm$ 0.79   | 5.00 $\pm$ 1.48    | -20.85 $\pm$ 0.46         | 7.91 $\pm$ 0.36           | 4.48 $\pm$ 0.72  |
| <i>Nezumia</i> sp. (Ns)                | 13 | 500-1100  | 17.39 $\pm$ 1.44  | 14.00 $\pm$ 3.61   | -17.13 $\pm$ 0.26         | 11.18 $\pm$ 0.47          | 3.14 $\pm$ 0.14  |
| <i>Scorpaena elongata</i> (Se)         | 5  | 200       | n/a               | n/a                | -17.93 $\pm$ 0.14         | 6.72 $\pm$ 0.19           | 2.83 $\pm$ 0.01  |
| <b>Decapod crustaceans</b>             |    |           |                   |                    |                           |                           |                  |
| <i>Acantheephyra eximia</i> (Ae)       | 11 | 1400      | 12.04 $\pm$ 2.19  | 13.18 $\pm$ 7.49   | -17.59 $\pm$ 0.30         | 6.95 $\pm$ 0.64           | 2.90 $\pm$ 0.11  |
| <i>Aristaeomorpha foliacea</i> (Af)    | 3  | 1400      | 9.83 $\pm$ 1.53   | 5.36 $\pm$ 1.54    | -17.97 $\pm$ 0.87         | 7.68 $\pm$ 0.68           | 2.90 $\pm$ 0.06  |
| <i>Aristeus antennatus</i> (Aa)        | 16 | 600-1400  | 11.69 $\pm$ 1.21  | 8.52 $\pm$ 2.97    | -18.26 $\pm$ 0.52         | 7.69 $\pm$ 0.37           | 2.85 $\pm$ 0.14  |
| <i>Parapenaeus longirostris</i> (Pl)   | 7  | 200       | 10.17 $\pm$ 0.82  | 4.34 $\pm$ 1.18    | -18.45 $\pm$ 0.10         | 6.72 $\pm$ 0.19           | 2.94 $\pm$ 0.08  |
| <i>Plesionika edwardsii</i> (Pe)       | 6  | 200-600   | 12.40 $\pm$ 1.51  | 5.81 $\pm$ 1.99    | -17.69 $\pm$ 0.17         | 6.15 $\pm$ 0.31           | 2.39 $\pm$ 0.12  |
| <i>Polycheles typhlops</i> (Pt)        | 3  | 1100-1400 | 6.93 $\pm$ 0.81   | 2.86 $\pm$ 0.58    | -16.38 $\pm$ 0.21         | 7.67 $\pm$ 0.18           | 3.36 $\pm$ 0.05  |
| <b>POM</b>                             |    |           |                   |                    |                           |                           |                  |
| Epipelagic                             | 29 | 0-200     | n/a               | n/a                | -23.90 $\pm$ 1.08         | 0.52 $\pm$ 1.84           | 8.75 $\pm$ 2.83  |
| Mesopelagic                            | 19 | 201-800   | n/a               | n/a                | -24.12 $\pm$ 1.29         | 3.74 $\pm$ 3.85           | 10.92 $\pm$ 3.69 |
| Bathypelagic                           | 29 | >800      | n/a               | n/a                | -24.36 $\pm$ 2.06         | 4.80 $\pm$ 2.42           | 9.81 $\pm$ 3.61  |

396

397

398 **Table 2:** Metrics for estimating isotopic niche size in fourteen fish and six decapod crustaceans from  
 399 the Levantine bathyal ( $n \geq 3$ ). TA, total area ( $\% \text{ } ^2$ ) encompassed by all data points of each species;  
 400 SEA, standardized ellipse area for each species;  $\text{SEA}_C$ , size-corrected standardized ellipse area.

| Sample type / Species    | TA   | SEA  | SEAC |
|--------------------------|------|------|------|
| <b>Fish</b>              |      |      |      |
| <i>B. mediterraneus</i>  | 0.00 | 0.00 | 0.01 |
| <i>C. caelorhincus</i>   | 3.20 | 1.84 | 2.04 |
| <i>D. macrophthalmus</i> | 1.61 | 0.85 | 0.94 |
| <i>E. spinax</i>         | 0.01 | 0.03 | 0.05 |
| <i>G. melastomus</i>     | 0.09 | 0.10 | 0.15 |
| <i>H. dactylopterus</i>  | 0.53 | 0.21 | 0.22 |
| <i>H. mediterraneus</i>  | 0.34 | 0.25 | 0.31 |
| <i>L. cavillone</i>      | 0.31 | 0.27 | 0.34 |
| <i>M. scolopax</i>       | 0.60 | 0.49 | 0.66 |
| <i>Nezumia</i> sp.       | 0.90 | 0.37 | 0.41 |
| <i>S. elongata</i>       | 0.24 | 0.24 | 0.32 |
| <b>Crustaceans</b>       |      |      |      |
| <i>A. eximia</i>         | 0.90 | 0.50 | 0.56 |
| <i>A. foliacea</i>       | 0.27 | 0.48 | 0.96 |
| <i>A. antennatus</i>     | 1.91 | 0.59 | 0.63 |
| <i>P. longirostris</i>   | 0.08 | 0.06 | 0.07 |
| <i>P. edwardsii</i>      | 0.21 | 0.16 | 0.20 |
| <i>P. typhlops</i>       | 0.03 | 0.06 | 0.12 |

401

402 **Table 3:** Community metrics for estimating isotopic niche size (Layman et al. 2007) in bathypelagic  
 403 fish and bathybenthic crustaceans. TA, total area ( $\% \text{ } ^2$ ) encompassed by all data points of each  
 404 assemblage (crustaceans, fish); CD, mean distance to centroid (trophic diversity); MNND, mean  
 405 nearest neighbour distance (trophic similarity); SDMNND, the standard deviation of MNND (trophic  
 406 evenness).

|                             | Crustaceans | Fish |
|-----------------------------|-------------|------|
| $\delta^{13}\text{C}$ range | 1.54        | 4.67 |
| $\delta^{15}\text{N}$ range | 2.07        | 3.71 |
| TA                          | 1.87        | 7.37 |
| CD                          | 0.81        | 1.29 |
| MNND                        | 0.75        | 0.82 |
| SDNND                       | 0.43        | 0.52 |

407

408

## 409 **7 Conflict of Interest**

410 The authors declare that the research was conducted in the absence of any commercial or financial  
 411 relationships that could be construed as a potential conflict of interest.

## 412 **8 Author Contributions**

413 G.S-V. and T. G-H. conceived this study. G.S-V., N.S. and T.G-H. collected the data. N.S. provided  
414 species identification and measurements. G.S-V. and T. G-H. analyzed and modeled the stable  
415 isotope data. All coauthors contributed substantially to drafting the manuscript, and approved the  
416 final submitted manuscript.

## 417 **9 Acknowledgments**

418 The authors wish to thank Mor Kanari for map preparation, and the captain and crew of R/V Bat-  
419 Galim, including onboard technical and scientific personnel for assistance in sampling. This work  
420 was supported by the National Monitoring Program of the Israeli Mediterranean waters.

## 421 **10 References**

- 422 Albo-Puigserver, M., Navarro, J., Coll, M., Layman, C.A., and Palomera, I. (2016). Trophic structure  
423 of pelagic species in the northwestern Mediterranean Sea. *Journal of Sea Research* 117, 27-  
424 35.
- 425 Belkin, N., Guy-Haim, T., Rubin-Blum, M., Lazar, A., Sisma-Ventura, G., Kiko, R., Morov, A.R.,  
426 Ozer, T., Gertman, I., and Herut, B. (2022). Influence of cyclonic and anti-cyclonic eddies on  
427 plankton biomass, activity and diversity in the southeastern Mediterranean Sea. *Ocean*  
428 *Science Discussions*, 1-56.
- 429 Bergstad, O. (2013). North Atlantic demersal deep-water fish distribution and biology: present  
430 knowledge and challenges for the future. *Journal of fish Biology* 83, 1489-1507.
- 431 Bond, A.L., and Diamond, A.W. (2011). Recent Bayesian stable-isotope mixing models are highly  
432 sensitive to variation in discrimination factors. *Ecological Applications* 21, 1017-1023.
- 433 Boyle, M., Ebert, D., and Cailliet, G. (2012). Stable-isotope analysis of a deep-sea benthic-fish  
434 assemblage: evidence of an enriched benthic food web. *Journal of fish biology* 80, 1485-  
435 1507.
- 436 Britton, J.R., and Busst, G.M. (2018). Stable isotope discrimination factors of omnivorous fishes:  
437 influence of tissue type, temperature, diet composition and formulated feeds. *Hydrobiologia*  
438 808, 219-234.
- 439 Carlier, A., Riera, P., Amouroux, J.-M., Bodiou, J.-Y., and Grémare, A. (2007). Benthic trophic  
440 network in the Bay of Banyuls-sur-Mer (northwest Mediterranean, France): an assessment  
441 based on stable carbon and nitrogen isotopes analysis. *Estuarine, Coastal and Shelf Science*  
442 72, 1-15.
- 443 Carpentieri, P., Serpetti, N., Colloca, F., Criscoli, A., and Ardizzone, G. (2016). Food preferences  
444 and rhythms of feeding activity of two co-existing demersal fish, the longspine snipefish,  
445 *Macroramphosus scolopax* (Linnaeus, 1758), and the boarfish *Capros aper* (Linnaeus, 1758),  
446 on the Mediterranean deep shelf. *Marine Ecology* 37, 106-118.
- 447 Caut, S., Angulo, E., and Courchamp, F. (2009). Variation in discrimination factors ( $\Delta^{15}\text{N}$  and  
448  $\Delta^{13}\text{C}$ ): the effect of diet isotopic values and applications for diet reconstruction. *Journal of*  
449 *Applied Ecology* 46, 443-453.
- 450 Choy, C.A., Popp, B.N., Hannides, C.C., and Drazen, J.C. (2015). Trophic structure and food  
451 resources of epipelagic and mesopelagic fishes in the North Pacific Subtropical Gyre

- 452 ecosystem inferred from nitrogen isotopic compositions. *Limnology and oceanography* 60,  
453 1156-1171.
- 454 Danovaro, R., Dell'anno, A., Corinaldesi, C., Magagnini, M., Noble, R., Tamburini, C., and  
455 Weinbauer, M. (2008). Major viral impact on the functioning of benthic deep-sea ecosystems.  
456 *Nature* 454, 1084-1087.
- 457 Davies, A.J., Roberts, J.M., and Hall-Spencer, J. (2007). Preserving deep-sea natural heritage:  
458 emerging issues in offshore conservation and management. *Biological conservation* 138, 299-  
459 312.
- 460 Drazen, J.C., and Sutton, T.T. (2017). Dining in the deep: the feeding ecology of deep-sea fishes.  
461 *Annual review of marine science* 9, 337-366.
- 462 Efrati, S., Lehahn, Y., Rahav, E., Kress, N., Herut, B., Gertman, I., Goldman, R., Ozer, T., Lazar, M.,  
463 and Heifetz, E. (2013). Intrusion of coastal waters into the pelagic eastern Mediterranean: in  
464 situ and satellite-based characterization. *Biogeosciences* 10, 3349-3357.
- 465 Fahl, K., and Nöthig, E.-M. (2007). Lithogenic and biogenic particle fluxes on the Lomonosov Ridge  
466 (central Arctic Ocean) and their relevance for sediment accumulation: Vertical vs. lateral  
467 transport. *Deep Sea Research Part I: Oceanographic Research Papers* 54, 1256-1272.
- 468 Fanelli, E., Azzurro, E., Bariche, M., Cartes, J.E., and Maynou, F. (2015). Depicting the novel  
469 Eastern Mediterranean food web: a stable isotopes study following Lessepsian fish invasion.  
470 *Biological Invasions* 17, 2163-2178.
- 471 Fanelli, E., and Cartes, J.E. (2010). Temporal variations in the feeding habits and trophic levels of  
472 three deep-sea demersal fishes from the western Mediterranean Sea, based on stomach  
473 contents and stable isotope analyses. *Marine Ecology Progress Series* 402, 213-232.
- 474 Fanelli, E., Cartes, J.E., and Papiol, V. (2011). Food web structure of deep-sea macrozooplankton  
475 and micronekton off the Catalan slope: insight from stable isotopes. *Journal of Marine*  
476 *Systems* 87, 79-89.
- 477 Galil, B.S., Danovaro, R., Rothman, S., Gevili, R., and Goren, M. (2019). Invasive biota in the deep-  
478 sea Mediterranean: an emerging issue in marine conservation and management. *Biological*  
479 *Invasions* 21, 281-288.
- 480 Gordon, J., and Swan, S. (1997). "Deep-water demersal fishes: data for assessment and biological  
481 analysis. Final Report of European Commission". DG XIV/C/1 Study Contract No. 94).
- 482 Gordon, J.D., Merrett, N.R., and Haedrich, R.L. (1995). "Environmental and biological aspects of  
483 slope-dwelling fishes of the North Atlantic," in *Deep-water Fisheries of the North Atlantic*  
484 *Oceanic Slope*. Springer), 1-26.
- 485 Goren, M., Mienis, H., and Galil, B. (2008). Not so poor—more deep-sea records from the Levant  
486 Sea, eastern Mediterranean. *Marine Biodiversity Records* 1.
- 487 Grossowicz, M., Sisma-Ventura, G., and Gal, G. (2019). Using stable carbon and nitrogen isotopes to  
488 investigate the impact of desalination brine discharge on marine food webs. *Frontiers in*  
489 *Marine Science* 6, 142.
- 490 Hannides, C.C., Zervoudaki, S., Frangoulis, C., and Lange, M.A. (2015). Mesozooplankton stable  
491 isotope composition in Cyprus coastal waters and comparison with the Aegean Sea (eastern  
492 Mediterranean). *Estuarine, Coastal and Shelf Science* 154, 12-18.

- 493 Helm, K.P., Bindoff, N.L., and Church, J.A. (2011). Observed decreases in oxygen content of the  
494 global ocean. *Geophysical Research Letters* 38.
- 495 Hopkins, T., and Gartner, J. (1992). Resource-partitioning and predation impact of a low-latitude  
496 myctophid community. *Marine Biology* 114, 185-197.
- 497 Jackson, A., and Parnell, A. (2021). Package ‘SIBER’. *R package version 2.1.4*.
- 498 Jackson, A.L., Inger, R., Parnell, A.C., and Bearhop, S. (2011). Comparing isotopic niche widths  
499 among and within communities: SIBER–Stable Isotope Bayesian Ellipses in R. *Journal of*  
500 *Animal Ecology* 80, 595-602.
- 501 Katz, T., Weinstein, Y., Alkalay, R., Biton, E., Toledo, Y., Lazar, A., Zlatkin, O., Soffer, R., Rahav,  
502 E., and Sisma-Ventura, G. (2020). The first deep-sea mooring station in the eastern Levantine  
503 basin (DeepLev), outline and insights into regional sedimentological processes. *Deep Sea*  
504 *Research Part II: Topical Studies in Oceanography* 171, 104663.
- 505 Kelly, C., Connolly, P., and Clarke, M. (1998). The deep water fisheries of the Rockall trough: some  
506 insights gleaned from Irish survey data.
- 507 Kim, H., Lee, K., Lim, D.-I., Nam, S.-I., Hee Han, S., Kim, J., Lee, E., Han, I.-S., Jin, Y.K., and  
508 Zhang, Y. (2019). Increase in anthropogenic mercury in marginal sea sediments of the  
509 Northwest Pacific Ocean. *Science of the Total Environment* 654, 801-810.
- 510 Koppelman, R., Böttger-Schnack, R., Möbius, J., and Weikert, H. (2009). Trophic relationships of  
511 zooplankton in the eastern Mediterranean based on stable isotope measurements. *Journal of*  
512 *Plankton Research* 31, 669-686.
- 513 Koppelman, R., Weikert, H., and Lahajnar, N. (2003). Vertical distribution of mesozooplankton and  
514 its  $\delta^{15}\text{N}$  signature at a deep-sea site in the Levantine Sea (eastern Mediterranean) in April  
515 1999. *Journal of Geophysical Research: Oceans* 108.
- 516 Koslow, J.A. (1993). Community structure in North Atlantic deep-sea fishes. *Progress in*  
517 *Oceanography* 31, 321-338.
- 518 Kress, N., Gertman, I., and Herut, B. (2014). Temporal evolution of physical and chemical  
519 characteristics of the water column in the Easternmost Levantine basin (Eastern  
520 Mediterranean Sea) from 2002 to 2010. *Journal of Marine Systems* 135, 6-13.
- 521 Kröncke, I., Türkay, M., and Fiege, D. (2003). Macrofauna communities in the Eastern  
522 Mediterranean deep sea. *Marine Ecology* 24, 193-216.
- 523 Layman, C.A., Arrington, D.A., Montaña, C.G., and Post, D.M. (2007). Can stable isotope ratios  
524 provide for community-wide measures of trophic structure? *Ecology* 88, 42-48.
- 525 Liu, M., Xiao, W., Zhang, Q., Shi, L., Wang, X., and Xu, Y. (2020). Methylmercury bioaccumulation  
526 in deepest ocean fauna: Implications for ocean mercury biotransport through food webs.  
527 *Environmental Science & Technology Letters* 7, 469-476.
- 528 Malpica-Cruz, L., Herzka, S.Z., Sosa-Nishizaki, O., and Lazo, J.P. (2012). Tissue-specific isotope  
529 trophic discrimination factors and turnover rates in a marine elasmobranch: empirical and  
530 modeling results. *Canadian Journal of Fisheries and Aquatic Sciences* 69, 551-564.
- 531 Menezes, G.M., Sigler, M.F., Silva, H.M., and Pinho, M.R. (2006). Structure and zonation of  
532 demersal fish assemblages off the Azores Archipelago (mid-Atlantic). *Marine Ecology*  
533 *Progress Series* 324, 241-260.

- 534 Mengerink, K.J., Van Dover, C.L., Ardron, J., Baker, M., Escobar-Briones, E., Gjerde, K., Koslow,  
535 J.A., Ramirez-Llodra, E., Lara-Lopez, A., and Squires, D. (2014). A call for deep-ocean  
536 stewardship. *Science* 344, 696-698.
- 537 Miller, T.W., Brodeur, R.D., and Rau, G.H. (2008). Carbon stable isotopes reveal relative  
538 contribution of shelf-slope production to the Northern California Current pelagic community.  
539 *Limnology and Oceanography* 53, 1493-1503.
- 540 Neat, F., Burns, F., and Drewery, J. (2008). The deepwater ecosystem of the continental shelf slope  
541 and seamounts of the Rockall Trough: a report on the ecology and biodiversity based on FRS  
542 scientific surveys. *Fisheries Research Services Internal Report*.
- 543 Olin, J.A., Hussey, N.E., Grgicak-Mannion, A., Fritts, M.W., Wintner, S.P., and Fisk, A.T. (2013).  
544 Variable  $\delta^{15}\text{N}$  diet-tissue discrimination factors among sharks: implications for trophic  
545 position, diet and food web models. *PLoS One* 8, e77567.
- 546 Ozer, T., Gertman, I., Kress, N., Silverman, J., and Herut, B. (2017). Interannual thermohaline  
547 (1979–2014) and nutrient (2002–2014) dynamics in the Levantine surface and intermediate  
548 water masses, SE Mediterranean Sea. *Global and Planetary Change* 151, 60-67.
- 549 Pajuelo, J.G., Seoane, J., Biscoito, M., Freitas, M., and González, J.A. (2016). Assemblages of deep-  
550 sea fishes on the middle slope off Northwest Africa (26–33 N, eastern Atlantic). *Deep Sea*  
551 *Research Part I: Oceanographic Research Papers* 118, 66-83.
- 552 Pakhomov, E., Perissinotto, R., and Mcquaid, C. (1996). Prey composition and daily rations of  
553 myctophid fishes in the Southern Ocean. *Marine Ecology Progress Series* 134, 1-14.
- 554 Papiol, V., Cartes, J.E., Fanelli, E., and Rumolo, P. (2013). Food web structure and seasonality of  
555 slope megafauna in the NW Mediterranean elucidated by stable isotopes: relationship with  
556 available food sources. *Journal of Sea Research* 77, 53-69.
- 557 Parzanini, C., Parrish, C.C., Hamel, J.-F., and Mercier, A. (2019). Reviews and syntheses: Insights  
558 into deep-sea food webs and global environmental gradients revealed by stable isotope ( $\delta^{15}\text{N}$ ,  $\delta^{13}\text{C}$ ) and fatty acid trophic biomarkers. *Biogeosciences* 16, 2837-2856.
- 560 Pecquerie, L., Nisbet, R.M., Fablet, R., Lorrain, A., and Kooijman, S.A. (2010). The impact of  
561 metabolism on stable isotope dynamics: a theoretical framework. *Philosophical Transactions*  
562 *of the Royal Society B: Biological Sciences* 365, 3455-3468.
- 563 Peterson, B.J., and Fry, B. (1987). Stable isotopes in ecosystem studies. *Annual review of ecology*  
564 *and systematics* 18, 293-320.
- 565 Polis, G.A., and Strong, D.R. (1996). Food web complexity and community dynamics. *The American*  
566 *Naturalist* 147, 813-846.
- 567 Polunin, N., Morales-Nin, B., Pawsey, W., Cartes, J.E., Pinnegar, J.K., and Moranta, J. (2001).  
568 Feeding relationships in Mediterranean bathyal assemblages elucidated by stable nitrogen and  
569 carbon isotope data. *Marine Ecology Progress Series* 220, 13-23.
- 570 Post, D.M. (2002). Using stable isotopes to estimate trophic position: models, methods, and  
571 assumptions. *Ecology* 83, 703-718.
- 572 Post, D.M., Layman, C.A., Arrington, D.A., Takimoto, G., Quattrochi, J., and Montana, C.G. (2007).  
573 Getting to the fat of the matter: models, methods and assumptions for dealing with lipids in  
574 stable isotope analyses. *Oecologia* 152, 179-189.

- 575 Protopapa, M., Koppelman, R., Zervoudaki, S., Wunsch, C., Peters, J., Parinos, C., Paraschos, F.,  
576 Gogou, A., and Möllmann, C. (2019). Trophic positioning of prominent copepods in the epi-  
577 and mesopelagic zone of the ultra-oligotrophic eastern Mediterranean Sea. *Deep Sea*  
578 *Research Part II: Topical Studies in Oceanography* 164, 144-155.
- 579 R Core Team (2020). "R: A Language and Environment for Statistical Computing". (Vienna, Austria:  
580 R Foundation for Statistical Computing).
- 581 Ramirez-Llodra, E., Brandt, A., Danovaro, R., Mol, B.D., Escobar, E., German, C.R., Levin, L.A.,  
582 Martinez Arbizu, P., Menot, L., and Buhl-Mortensen, P. (2010). Deep, diverse and definitely  
583 different: unique attributes of the world's largest ecosystem. *Biogeosciences* 7, 2851-2899.
- 584 Richards, T.M., Gipson, E.E., Cook, A., Sutton, T.T., and Wells, R.D. (2018). Trophic ecology of  
585 meso-and bathypelagic predatory fishes in the Gulf of Mexico. *ICES Journal of Marine*  
586 *Science* 76, 662-672.
- 587 Richards, T.M., Sutton, T.T., and Wells, R. (2020). Trophic structure and sources of variation  
588 influencing the stable isotope signatures of meso-and bathypelagic micronekton fishes.  
589 *Frontiers in Marine Science* 7, 876.
- 590 Rilov, G., and Galil, B. (2009). "Marine bioinvasions in the Mediterranean Sea—history, distribution  
591 and ecology," in *Biological invasions in marine ecosystems*. Springer), 549-575.
- 592 Robbins, C.T., Felicetti, L.A., and Sponheimer, M. (2005). The effect of dietary protein quality on  
593 nitrogen isotope discrimination in mammals and birds. *Oecologia* 144, 534-540.
- 594 Romero-Romero, S., Miller, E.C., Black, J.A., Popp, B.N., and Drazen, J.C. (2021). Abyssal deposit  
595 feeders are secondary consumers of detritus and rely on nutrition derived from microbial  
596 communities in their guts. *Scientific reports* 11, 1-11.
- 597 Sanchez-Vidal, A., Canals, M., Calafat, A.M., Lastras, G., Pedrosa-Pàmies, R., Menéndez, M.,  
598 Medina, R., Company, J.B., Hereu, B., and Romero, J. (2012). Impacts on the deep-sea  
599 ecosystem by a severe coastal storm. *PLoS one* 7, e30395.
- 600 Shipley, O.N., Brooks, E.J., Madigan, D.J., Sweeting, C.J., and Grubbs, R.D. (2017a). Stable isotope  
601 analysis in deep-sea chondrichthyans: recent challenges, ecological insights, and future  
602 directions. *Reviews in Fish Biology and Fisheries* 27, 481-497.
- 603 Shipley, O.N., Polunin, N.V., Newman, S.P., Sweeting, C.J., Barker, S., Witt, M.J., and Brooks, E.J.  
604 (2017b). Stable isotopes reveal food web dynamics of a data-poor deep-sea island slope  
605 community. *Food Webs* 10, 22-25.
- 606 Shoham-Frider, E., Gertner, Y., Guy-Haim, T., Herut, B., Kress, N., Shefer, E., and Silverman, J.  
607 (2020). Legacy groundwater pollution as a source of mercury enrichment in marine food web,  
608 Haifa Bay, Israel. *Science of The Total Environment* 714, 136711.
- 609 Sisma-Ventura, G., Yam, R., and Shemesh, A. (2014). Recent unprecedented warming and  
610 oligotrophy of the eastern Mediterranean Sea within the last millennium. *Geophysical*  
611 *Research Letters* 41, 5158-5166.
- 612 Smith, C.R., and Baco, A.R. (2003). "Ecology of whale falls at the deep-sea floor," in *Oceanography*  
613 *and Marine Biology, An Annual Review, Volume 41*. CRC Press), 319-333.
- 614 Stock, B., Semmens, B., Ward, E., Parnell, A., Jackson, A., and Phillips, D. (2021). Package  
615 'MixSIAR'. *Bayesian Mixing Models in R, Version 3.1.12*.

- 616 Stock, B.C., Jackson, A.L., Ward, E.J., Parnell, A.C., Phillips, D.L., and Semmens, B.X. (2018).  
617 Analyzing mixing systems using a new generation of Bayesian tracer mixing models. *PeerJ*  
618 6, e5096.
- 619 Stramma, L., Brandt, P., Schafstall, J., Schott, F., Fischer, J., and Körtzinger, A. (2008). Oxygen  
620 minimum zone in the North Atlantic south and east of the Cape Verde Islands. *Journal of*  
621 *Geophysical Research: Oceans* 113.
- 622 Stramma, L., Schmidtko, S., Levin, L.A., and Johnson, G.C. (2010). Ocean oxygen minima  
623 expansions and their biological impacts. *Deep Sea Research Part I: Oceanographic Research*  
624 *Papers* 57, 587-595.
- 625 Suchanek, T.H., Williams, S.L., Ogden, J.C., Hubbard, D.K., and Gill, I.P. (1985). Utilization of  
626 shallow-water seagrass detritus by Caribbean deep-sea macrofauna:  $\delta^{13}\text{C}$  evidence. *Deep*  
627 *Sea Research Part A. Oceanographic Research Papers* 32, 201-214.
- 628 Sweeting, C., Barry, J., Barnes, C., Polunin, N., and Jennings, S. (2007). Effects of body size and  
629 environment on diet-tissue  $\delta^{15}\text{N}$  fractionation in fishes. *Journal of Experimental Marine*  
630 *Biology and Ecology* 340, 1-10.
- 631 Tecchio, S., Coll, M., and Sardà, F. (2015). Structure, functioning, and cumulative stressors of  
632 Mediterranean deep-sea ecosystems. *Progress in Oceanography* 135, 156-167.
- 633 Tecchio, S., Van Oevelen, D., Soetaert, K., Navarro, J., and Ramírez-Llodra, E. (2013). Trophic  
634 dynamics of deep-sea megabenthos are mediated by surface productivity. *PloS one* 8, e63796.
- 635 Thurber, A.R., Sweetman, A.K., Narayanaswamy, B.E., Jones, D.O., Ingels, J., and Hansman, R.  
636 (2014). Ecosystem function and services provided by the deep sea. *Biogeosciences* 11, 3941-  
637 3963.
- 638 Trueman, C., Johnston, G., O'hea, B., and Mackenzie, K. (2014). Trophic interactions of fish  
639 communities at midwater depths enhance long-term carbon storage and benthic production on  
640 continental slopes. *Proceedings of the Royal Society B: Biological Sciences* 281, 20140669.
- 641 Valls, M., Olivar, M.P., De Puellas, M.F., Molí, B., Bernal, A., and Sweeting, C. (2014). Trophic  
642 structure of mesopelagic fishes in the western Mediterranean based on stable isotopes of  
643 carbon and nitrogen. *Journal of Marine Systems* 138, 160-170.
- 644 Walsh, J.J. (1991). Importance of continental margins in the marine biogeochemical cycling of  
645 carbon and nitrogen. *Nature* 350, 53-55.
- 646 Winemiller, K.O., and Polis, G.A. (1996). "Food webs: what can they tell us about the world?," in  
647 *Food Webs*. Springer), 1-22.
- 648 Yasuhara, M., Cronin, T.M., Demenocal, P.B., Okahashi, H., and Linsley, B.K. (2008). Abrupt  
649 climate change and collapse of deep-sea ecosystems. *Proceedings of the National Academy of*  
650 *Sciences* 105, 1556-1560.
- 651
- 652



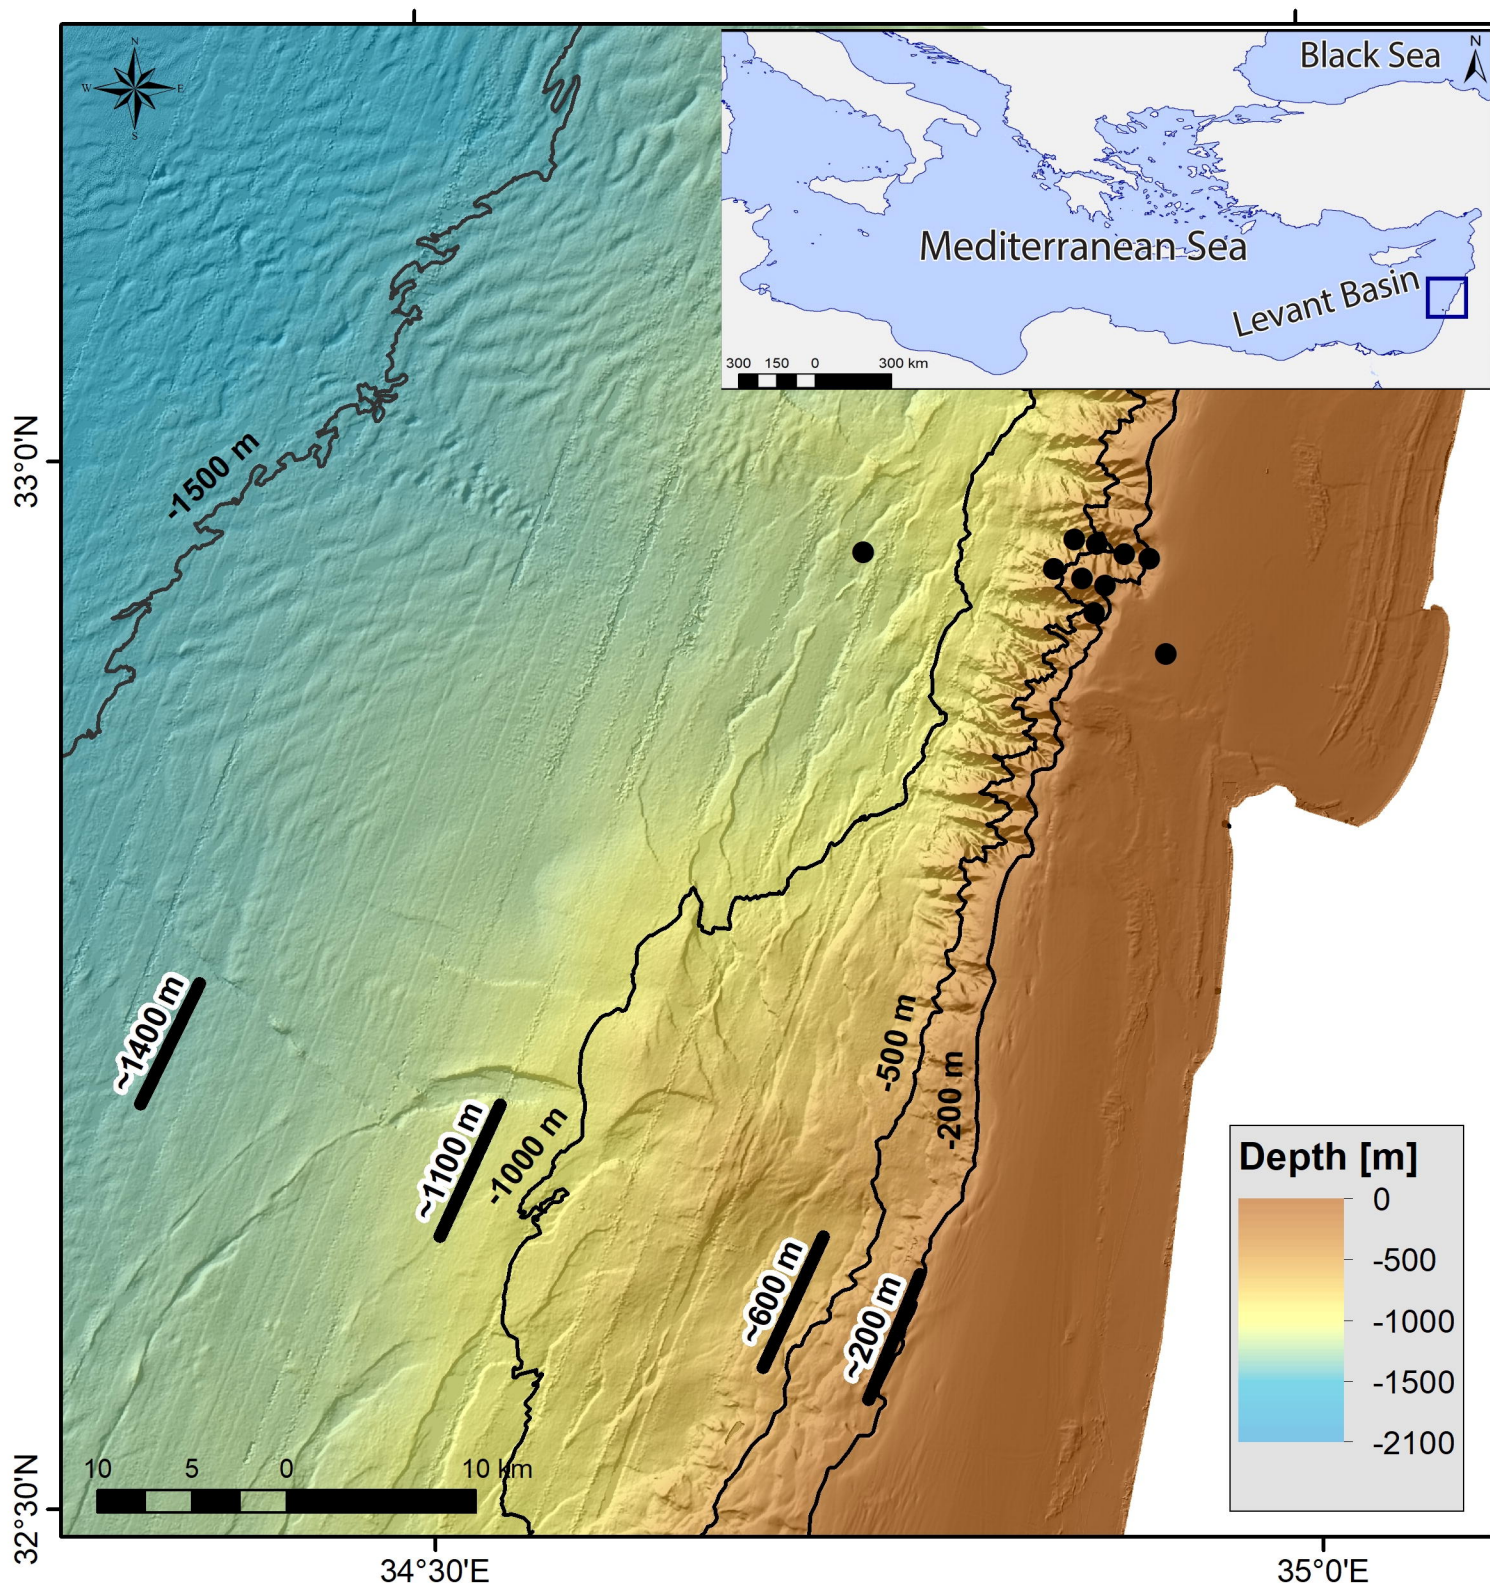

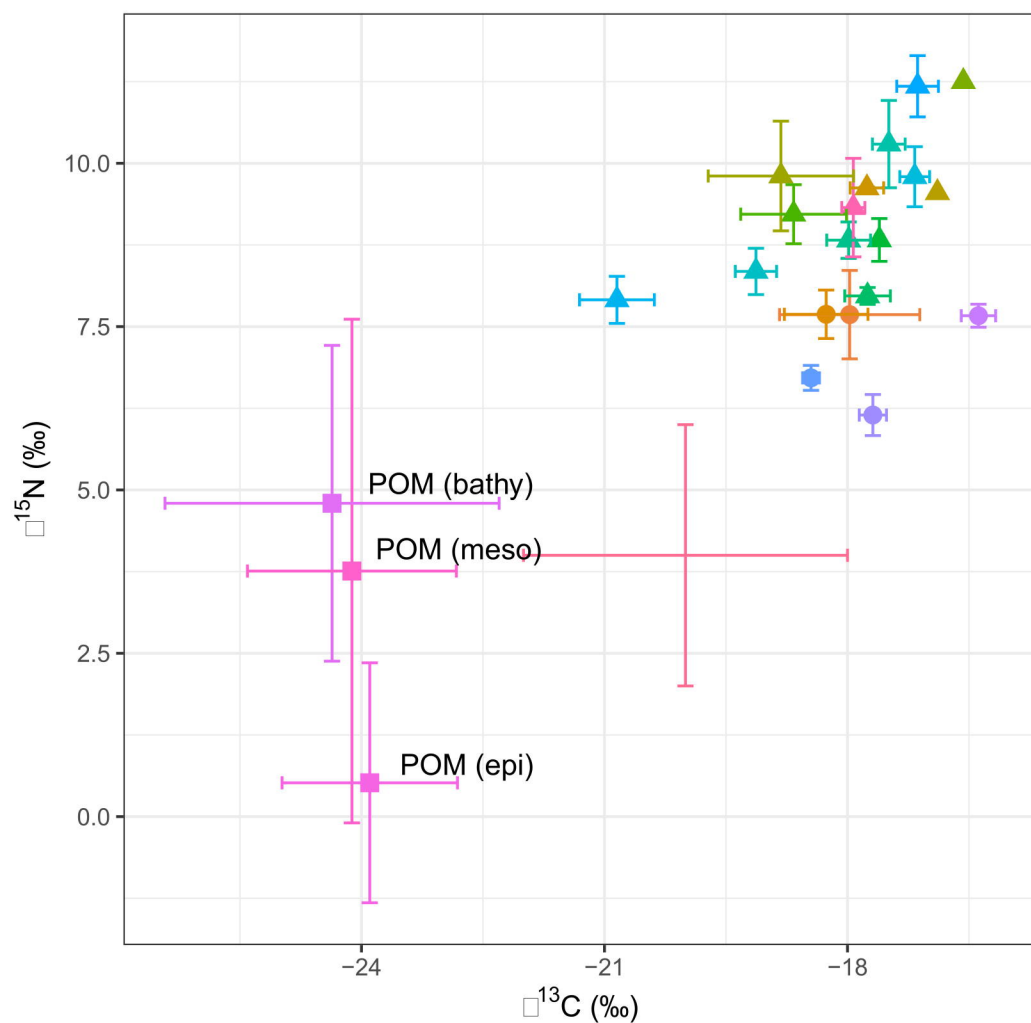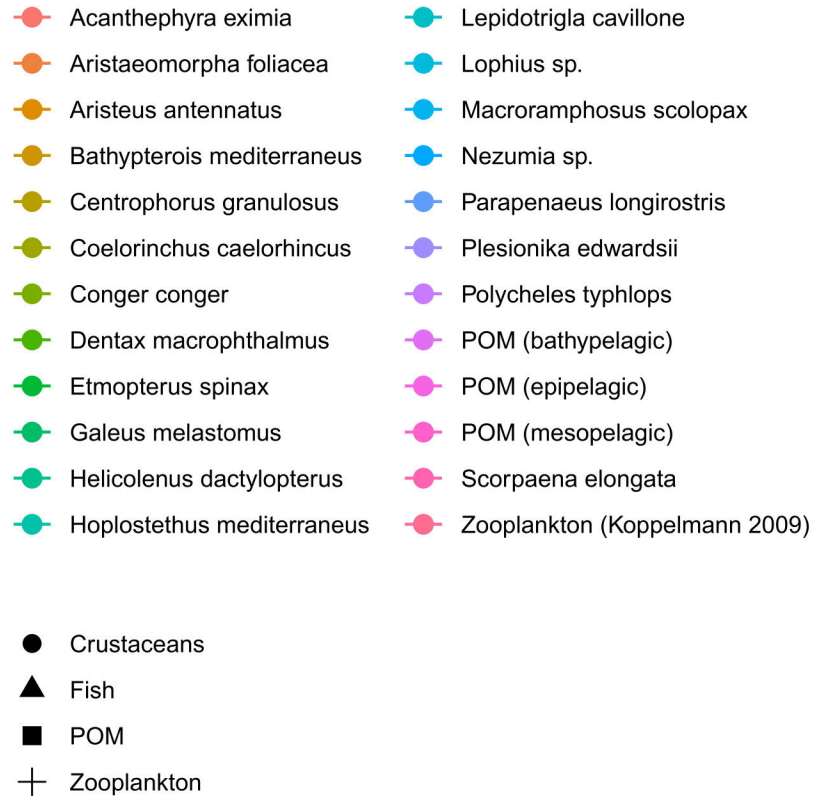

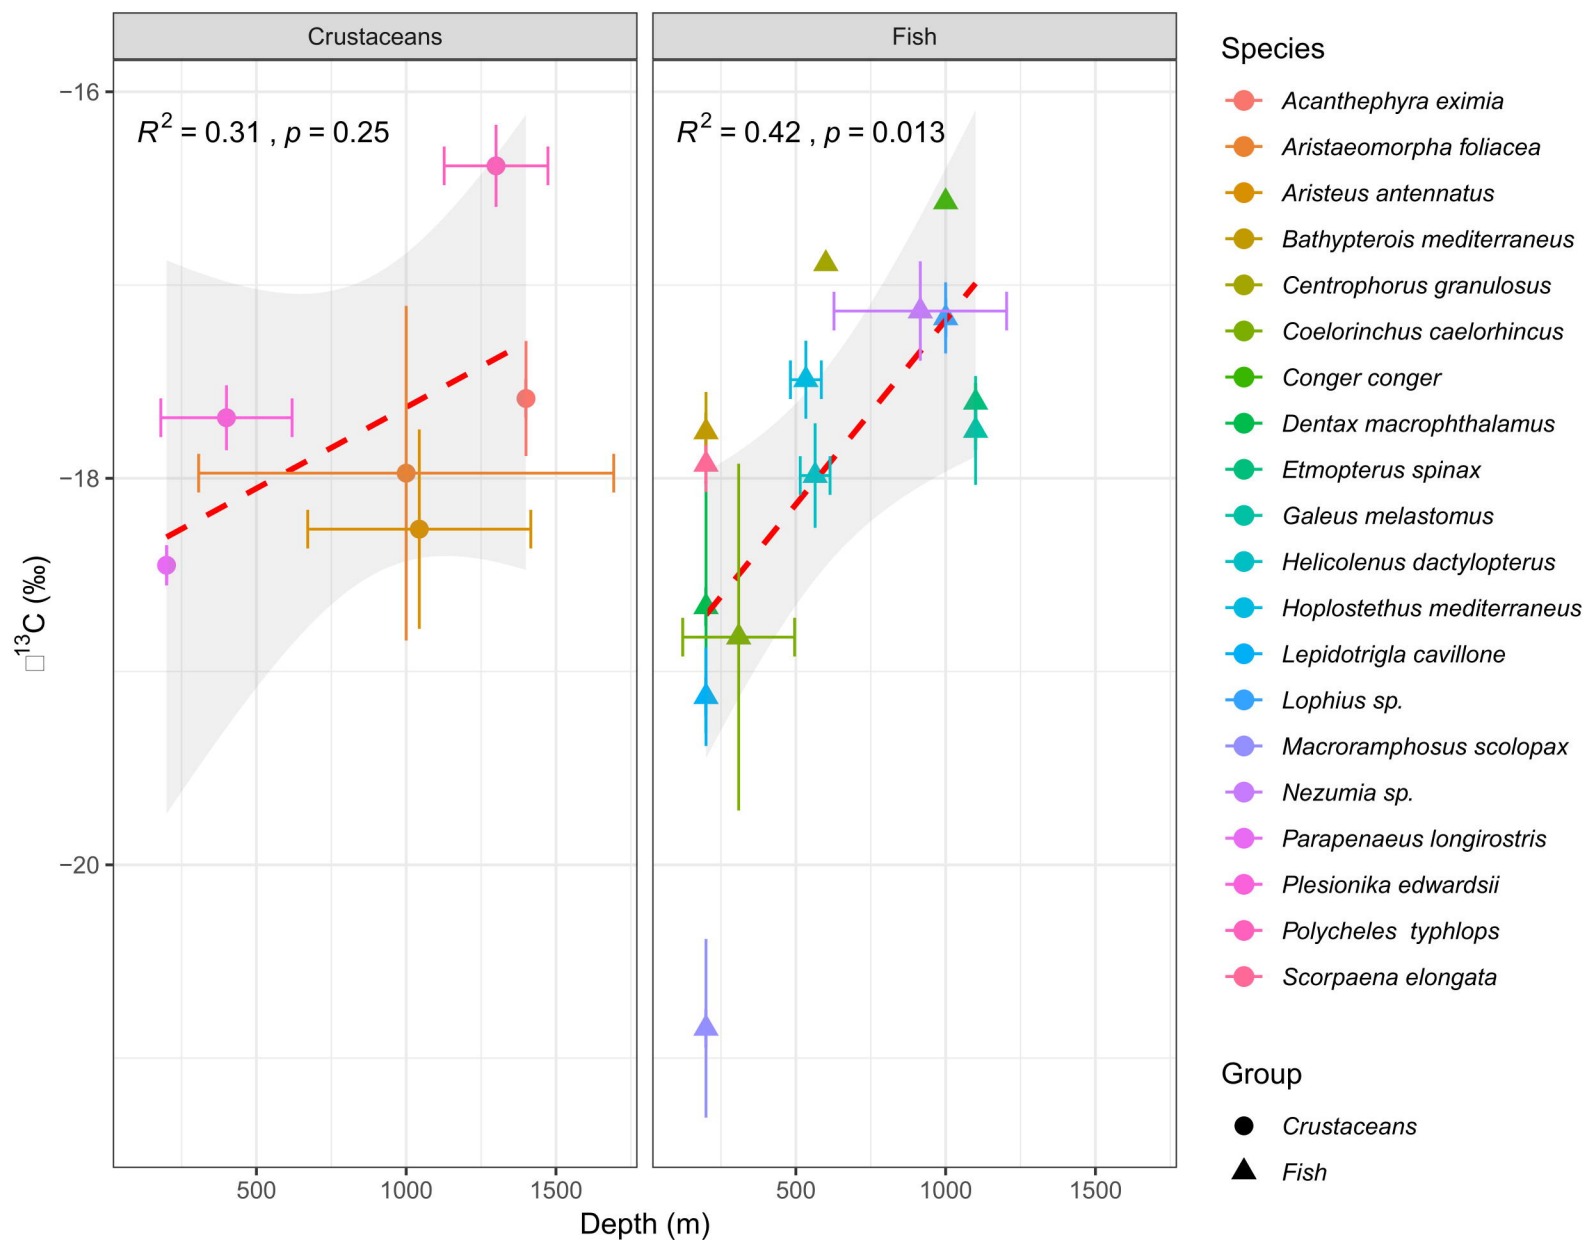

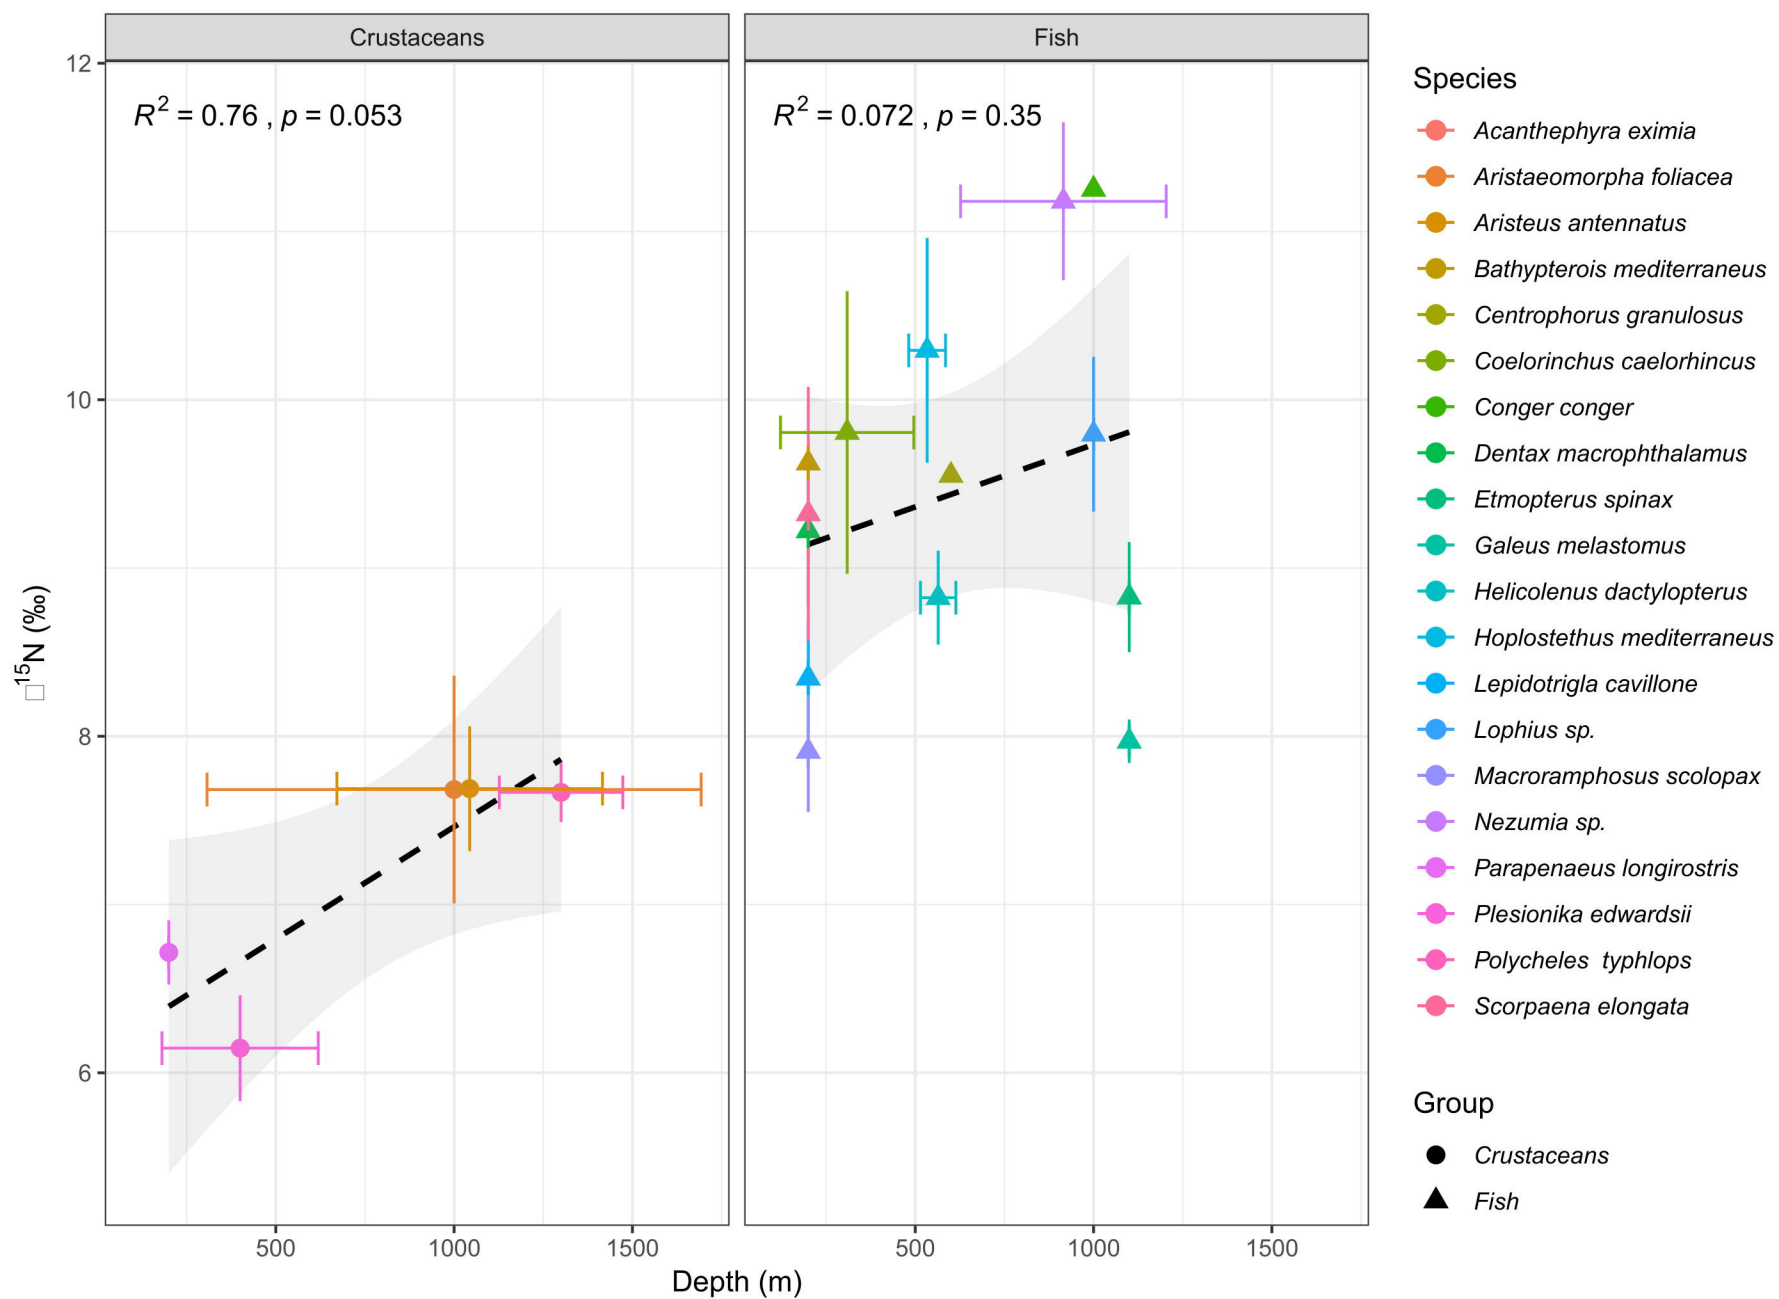

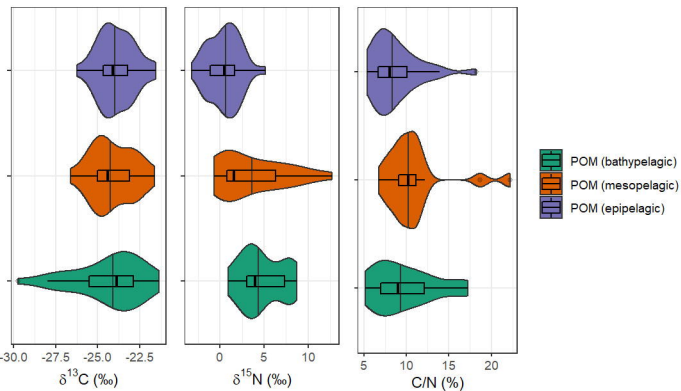

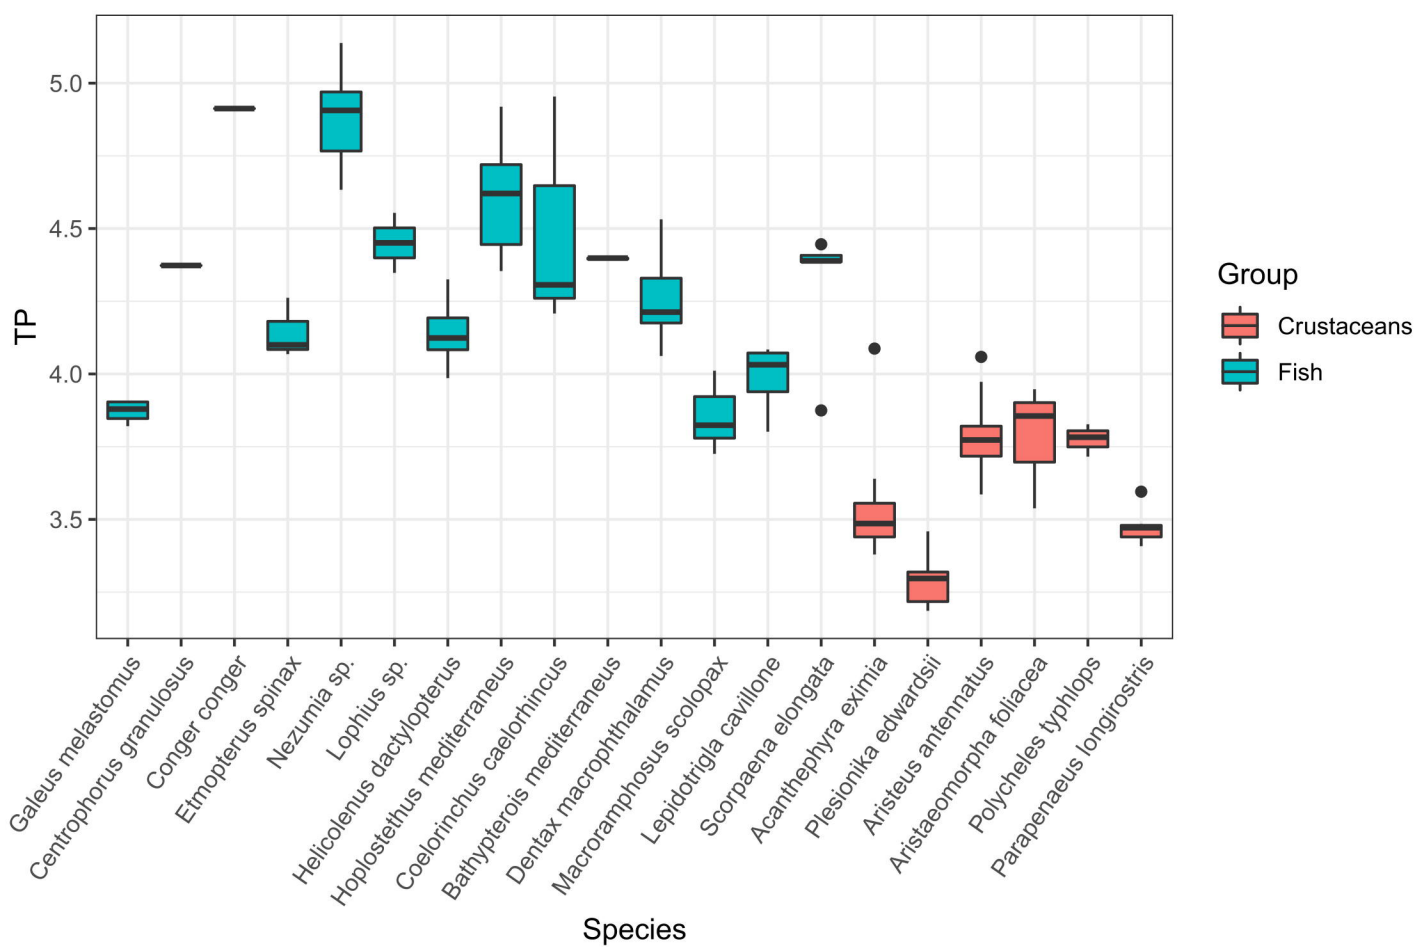

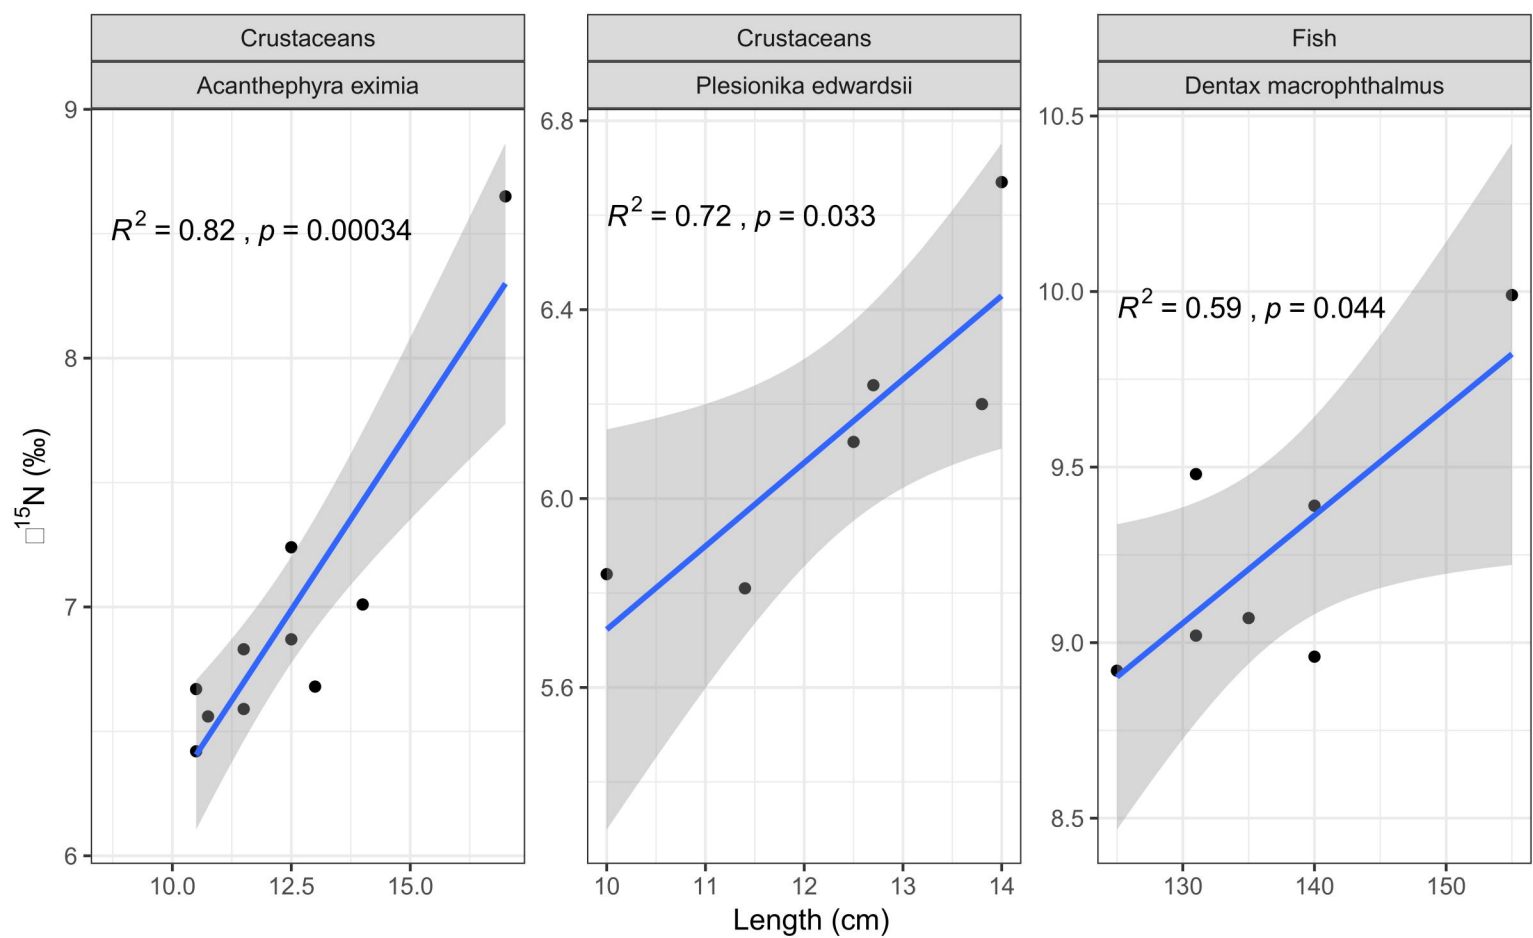

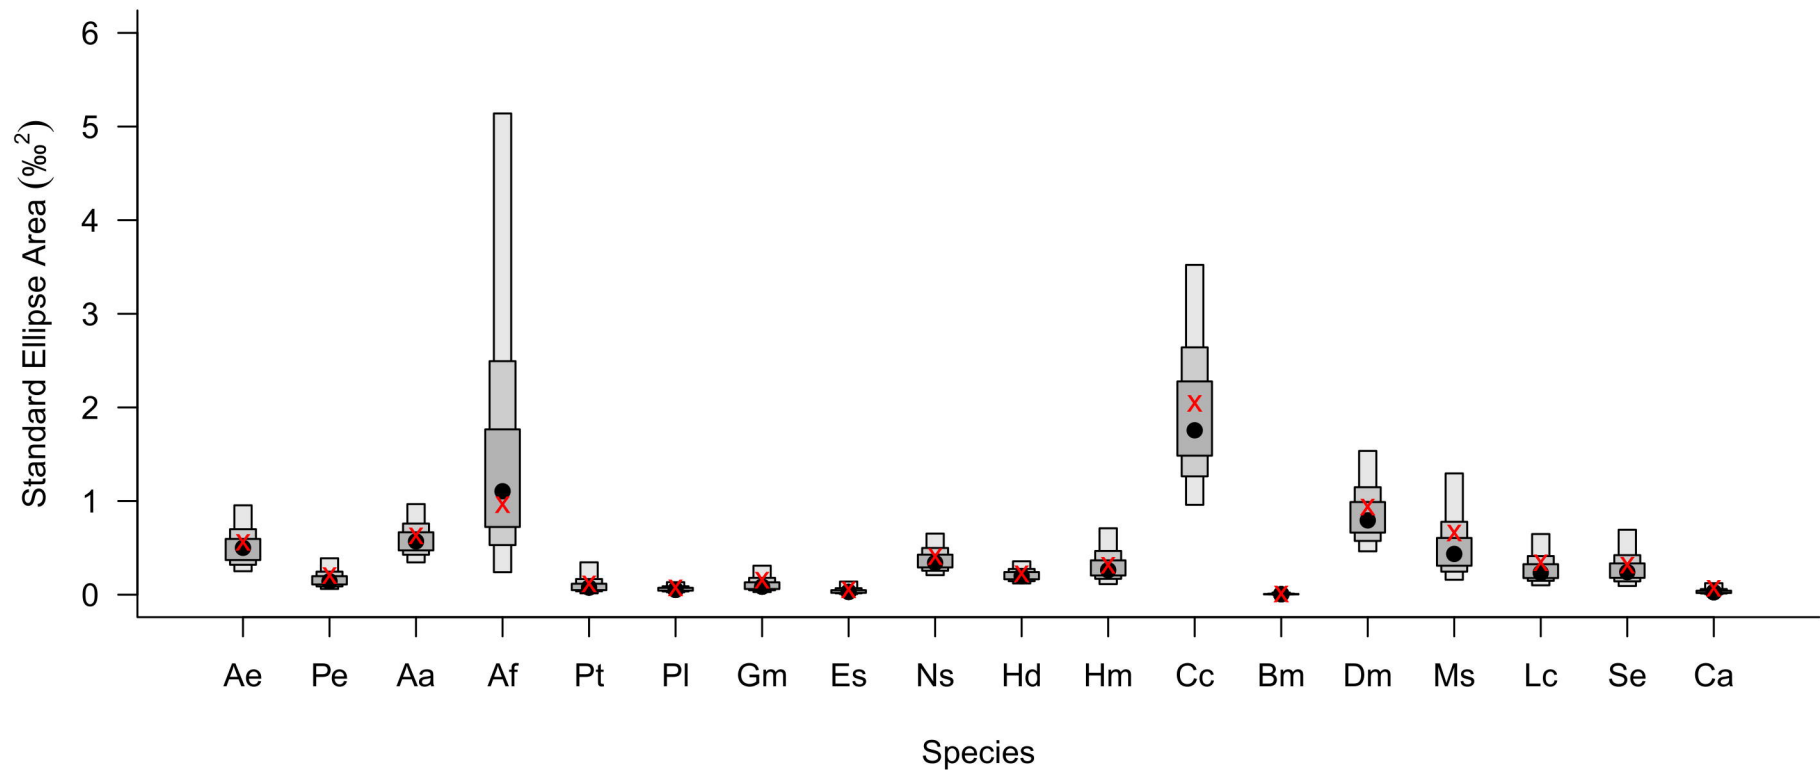



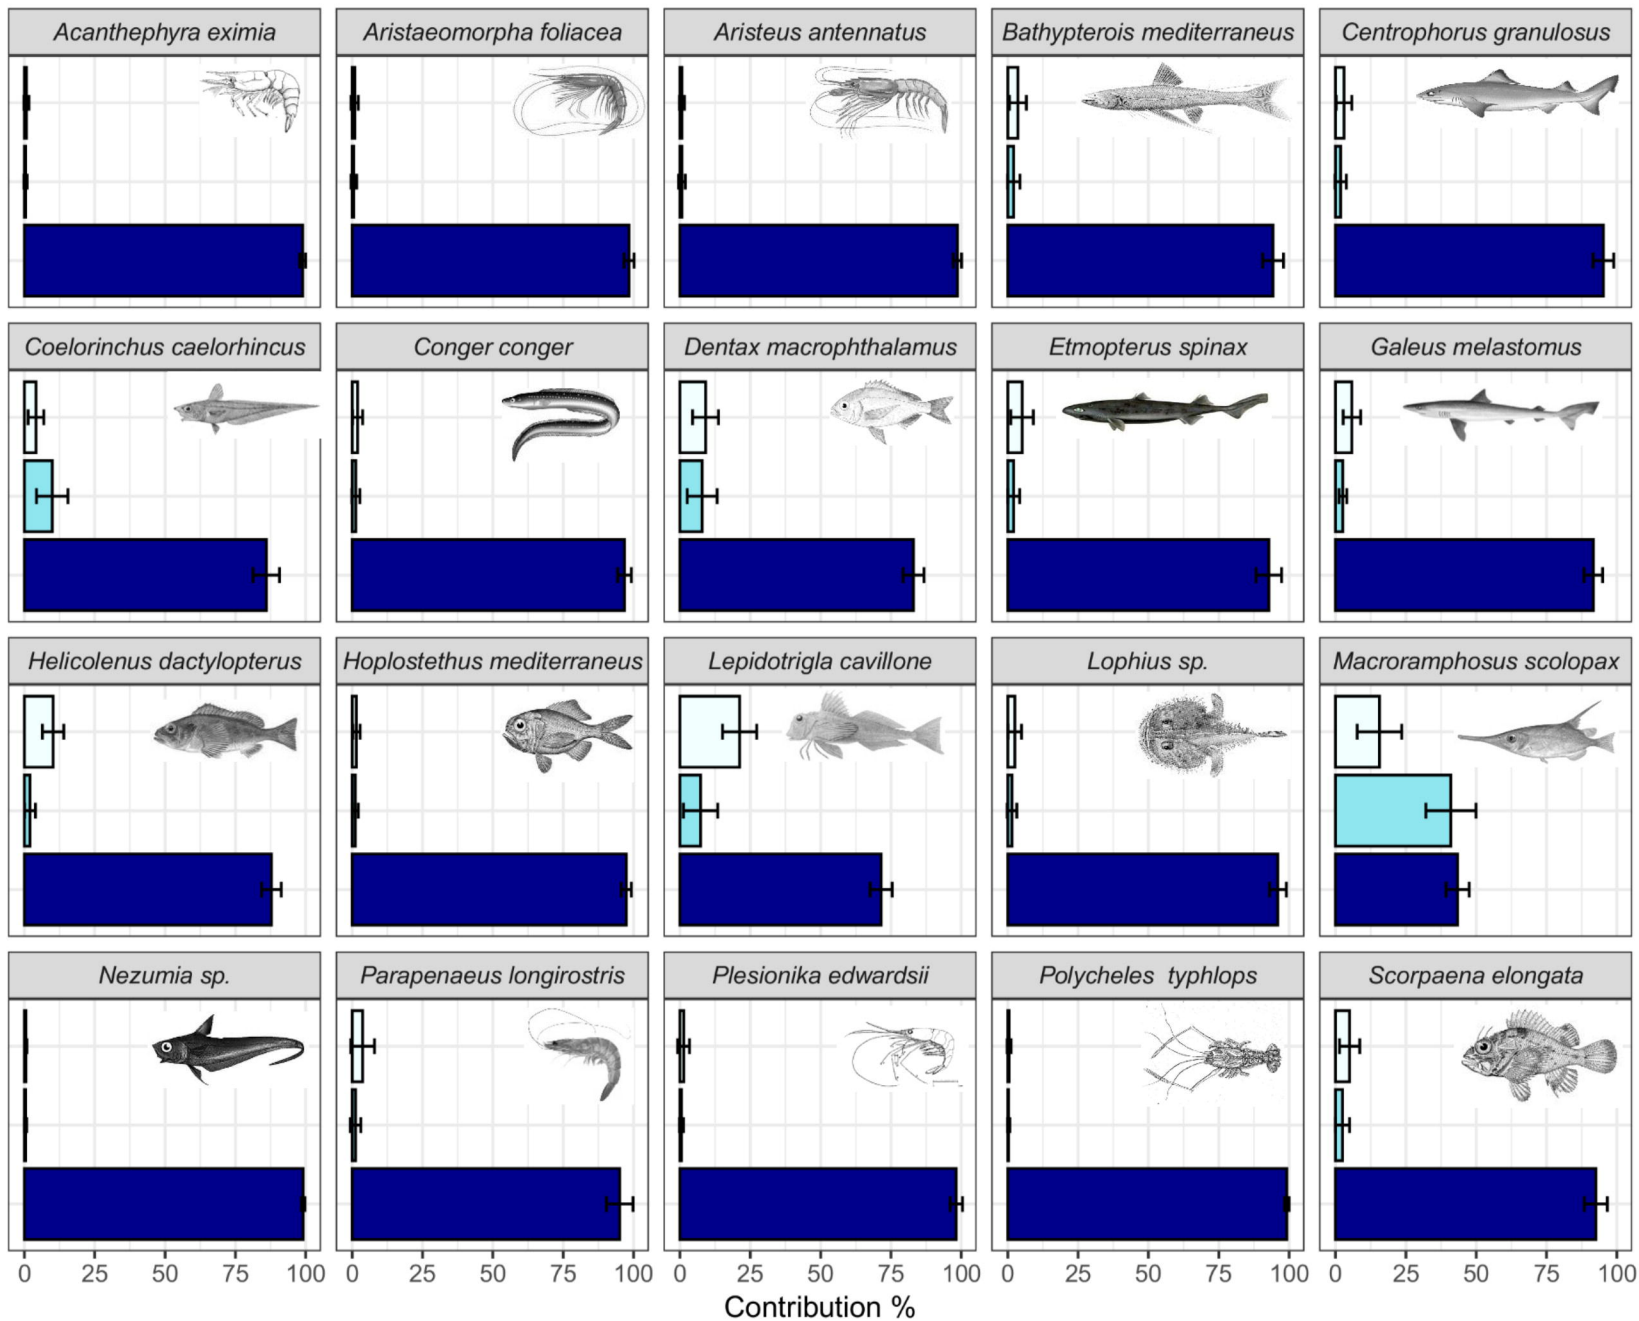

POM

- Epipelagic
- Mesopelagic
- Bathypelagic
